# Supplementary material for: Loss of function variant in SMIM1 is associated with reduced energy expenditure and weight gain
Source: Research Square preprint supplement (doi:10.21203/rs.3.rs-1239303/v1), 2022-01-24
Supplement: Supplementary file 4 [file 9303114657b78a5541ada725.xlsx]

## Sheet: Sex and BMI corrected
feature	effect	cohort	CI_low	CI_high	p.val	p.val.FDR
AST	1.26907	SMIM1-/-	0.844907	1.66659	2.37251e-08	4.03327e-07
FFA	1.18825	SMIM1-/-	0.745863	1.58359	1.67747e-07	1.42585e-06
Total_T3	-0.860783	SMIM1-/-	-1.2935	-0.416474	0.000174296	0.000987677
ALT	0.781147	SMIM1-/-	0.356112	1.19366	0.000349223	0.0014842
Total_T4	-0.741502	SMIM1-/-	-1.1692	-0.303344	0.00100323	0.00284249
hsCRP	0.33662	SMIM1-/-	0.184063	1.10433	0.00648212	0.0194464
LAR	0.39728	SMIM1-/-	0.049335	0.7402	0.0253674	0.0616067
Ferritin	0.458053	SMIM1-/-	-0.0477146	0.953425	0.0756085	0.143321
LEPT	0.257881	SMIM1-/-	-0.0269947	0.539577	0.0758757	0.143321
TG	-0.346564	SMIM1-/-	-0.764478	0.0757037	0.107419	0.182613
ADPN	-0.280684	SMIM1-/-	-0.651845	0.0939843	0.141588	0.200583
Free_T4	1.01406	SMIM1-/-	-0.377183	2.40531	0.154264	0.218541
TSH	-0.318543	SMIM1-/-	-0.769872	0.136812	0.169789	0.222031
Free_T3	-0.463384	SMIM1-/-	-1.14683	0.220063	0.184999	0.224641
LDL	0.140712	SMIM1-/-	-0.313662	0.595036	0.541739	0.61397
HDL	0.0802366	SMIM1-/-	-0.324171	0.48364	0.697166	0.740739
CHOL	-0.0186341	SMIM1-/-	-0.455718	0.418725	0.933523	0.933523

## Sheet: Female - BMI corrected
feature	effect	cohort	CI_low	CI_high	p.val	p.val.FDR
AST	1.28553	SMIM1-/-	0.875493	1.69557	1.1381e-08	1.4914e-07
FFA	1.18922	SMIM1-/-	0.763569	1.61487	1.4727e-07	1.3656e-06
Total_T3	-0.86632	SMIM1-/-	-1.30603	-0.426613	0.00014967	0.0007633
ALT	0.81586	SMIM1-/-	0.36868	1.26304	0.00041889	0.00158248
Total_T4	-0.777274	SMIM1-/-	-1.21935	-0.335198	0.00068203	0.00239888
Ferritin	0.486871	SMIM1-/-	-0.0162309	0.989973	0.0576875	0.120084
LAR	0.360237	SMIM1-/-	-0.0223005	0.742775	0.0647526	0.129505
ADPN	-0.330923	SMIM1-/-	-0.771985	0.110139	0.140376	0.242027
TG	-0.321472	SMIM1-/-	-0.754667	0.111722	0.144742	0.242027
TSH	-0.31419	SMIM1-/-	-0.770436	0.142057	0.175691	0.26747
hsCRP	0.297499	SMIM1-/-	-0.14565	0.740648	0.186188	0.275235
LEPT	0.195246	SMIM1-/-	-0.211904	0.602396	0.34504	0.414048
LDL	0.117076	SMIM1-/-	-0.348309	0.582461	0.620021	0.672789
CHOL	-0.0424497	SMIM1-/-	-0.49169	0.406791	0.852211	0.878036
HDL	0.0338455	SMIM1-/-	-0.412484	0.480175	0.881153	0.889877

## Sheet: Male - BMI corrected
feature	effect	cohort	CI_low	CI_high	p.val	p.val.FDR
AST	1.28553	SMIM1-/-	0.875493	1.69557	1.1381e-08	1.4914e-07
FFA	1.18922	SMIM1-/-	0.763569	1.61487	1.4727e-07	1.3656e-06
Total_T3	-0.86632	SMIM1-/-	-1.30603	-0.426613	0.00014967	0.0007633
ALT	0.81586	SMIM1-/-	0.36868	1.26304	0.00041889	0.00158248
Total_T4	-0.777274	SMIM1-/-	-1.21935	-0.335198	0.00068203	0.00239888
Ferritin	0.486871	SMIM1-/-	-0.0162309	0.989973	0.0576875	0.120084
LAR	0.360237	SMIM1-/-	-0.0223005	0.742775	0.0647526	0.129505
ADPN	-0.330923	SMIM1-/-	-0.771985	0.110139	0.140376	0.242027
TG	-0.321472	SMIM1-/-	-0.754667	0.111722	0.144742	0.242027
TSH	-0.31419	SMIM1-/-	-0.770436	0.142057	0.175691	0.26747
hsCRP	0.297499	SMIM1-/-	-0.14565	0.740648	0.186188	0.275235
LEPT	0.195246	SMIM1-/-	-0.211904	0.602396	0.34504	0.414048
LDL	0.117076	SMIM1-/-	-0.348309	0.582461	0.620021	0.672789
CHOL	-0.0424497	SMIM1-/-	-0.49169	0.406791	0.852211	0.878036
HDL	0.0338455	SMIM1-/-	-0.412484	0.480175	0.881153	0.889877

## Sheet: Sex corrected - no BMI correcte
feature	effect	cohort	CI_low	CI_high	p.val	p.val.FDR
AST	1.3215	SMIM1-/-	0.940573	1.70242	2.5813e-10	8.7763e-09
FFA	1.18081	SMIM1-/-	0.790789	1.57083	1.1697e-08	1.4914e-07
Total_T3	-0.89908	SMIM1-/-	-1.31085	-0.487305	2.7058e-05	0.000184
ALT	0.819255	SMIM1-/-	0.433785	1.20472	4.1855e-05	0.00026212
Total_T4	-0.760893	SMIM1-/-	-1.17293	-0.348855	0.00035574	0.00145142
LAR	0.531213	SMIM1-/-	0.132137	0.930289	0.009346	0.0257647
LEPT	0.384729	SMIM1-/-	0.0534669	0.715991	0.0230582	0.061893
ADPN	-0.373515	SMIM1-/-	-0.734994	-0.0120368	0.0429122	0.0951531
Ferritin	0.447914	SMIM1-/-	-0.0002201	0.896048	0.0501106	0.108751
BMI	2.19152	SMIM1-/-	-0.249225	4.63226	0.0780972	0.159484
hsCRP	0.304843	SMIM1-/-	-0.127109	0.736794	0.165143	0.263196
TG	-0.252227	SMIM1-/-	-0.660536	0.156083	0.224618	0.321478
TSH	-0.257488	SMIM1-/-	-0.696383	0.181408	0.24864	0.32815
CHOL	-0.211827	SMIM1-/-	-0.624408	0.200754	0.312557	0.39359
LDL	-0.0973351	SMIM1-/-	-0.518487	0.323816	0.649065	0.696891
HDL	-0.0595287	SMIM1-/-	-0.448792	0.329735	0.763305	0.80265

## Sheet: Female - no BMI corrected
feature	effect	cohort	CI_low	CI_high	p.val	p.val.FDR
AST	1.36312	SMIM1-/-	0.983762	1.74247	7.115e-11	3.6287e-09
FFA	1.18311	SMIM1-/-	0.794484	1.57173	9.7951e-09	1.4914e-07
Total_T3	-0.906463	SMIM1-/-	-1.31689	-0.496037	2.2017e-05	0.00016041
ALT	0.868294	SMIM1-/-	0.457287	1.2793	4.6257e-05	0.00026212
Total_T4	-0.797636	SMIM1-/-	-1.21475	-0.38052	0.00022152	0.00098239
LAR	0.483724	SMIM1-/-	0.0609564	0.906492	0.0251436	0.0631093
Ferritin	0.490972	SMIM1-/-	0.0455369	0.936408	0.0310669	0.0736935
ADPN	-0.439589	SMIM1-/-	-0.858808	-0.0203709	0.0399547	0.090564
LEPT	0.302605	SMIM1-/-	-0.121674	0.726884	0.161148	0.260906
hsCRP	0.264368	SMIM1-/-	-0.166279	0.695015	0.226926	0.321478
TSH	-0.255618	SMIM1-/-	-0.693445	0.18221	0.250938	0.32815
CHOL	-0.233139	SMIM1-/-	-0.649207	0.18293	0.270519	0.344911
TG	-0.212756	SMIM1-/-	-0.634028	0.208515	0.320523	0.393896
HDL	-0.12195	SMIM1-/-	-0.546707	0.302807	0.571941	0.635507
LDL	-0.121936	SMIM1-/-	-0.548052	0.30418	0.573202	0.635507
BMI	1.08255	SMIM1-/-	-2.88311	5.04821	0.588894	0.59524

## Sheet: Male - no BMI corrected
feature	effect	cohort	CI_low	CI_high	p.val	p.val.FDR
AST	1.36312	SMIM1-/-	0.983762	1.74247	7.115e-11	3.6287e-09
FFA	1.18311	SMIM1-/-	0.794484	1.57173	9.7951e-09	1.4914e-07
Total_T3	-0.906463	SMIM1-/-	-1.31689	-0.496037	2.2017e-05	0.00016041
ALT	0.868294	SMIM1-/-	0.457287	1.2793	4.6257e-05	0.00026212
Total_T4	-0.797636	SMIM1-/-	-1.21475	-0.38052	0.00022152	0.00098239
BMI	3.50737	SMIM1-/-	0.721463	6.29327	0.0143325	0.0628591
LAR	0.483724	SMIM1-/-	0.0609564	0.906492	0.0251436	0.0631093
Ferritin	0.490972	SMIM1-/-	0.0455369	0.936408	0.0310669	0.0736935
ADPN	-0.439589	SMIM1-/-	-0.858808	-0.0203709	0.0399547	0.090564
LEPT	0.302605	SMIM1-/-	-0.121674	0.726884	0.161148	0.260906
hsCRP	0.264368	SMIM1-/-	-0.166279	0.695015	0.226926	0.321478
TSH	-0.255618	SMIM1-/-	-0.693445	0.18221	0.250938	0.32815
CHOL	-0.233139	SMIM1-/-	-0.649207	0.18293	0.270519	0.344911
TG	-0.212756	SMIM1-/-	-0.634028	0.208515	0.320523	0.393896
HDL	-0.12195	SMIM1-/-	-0.546707	0.302807	0.571941	0.635507
LDL	-0.121936	SMIM1-/-	-0.548052	0.30418	0.573202	0.635507
