# Supplementary material for: Loss of function variant in SMIM1 is associated with reduced energy expenditure and weight gain
Source: Research Square preprint supplement (doi:10.21203/rs.3.rs-1239303/v1), 2022-01-24
Supplement: Supplementary file 6 [file bd85e4b4d60dfec43bb518be.xlsx]

## Sheet: SMIM1-- REE Z Scores
cohort	Subject	REE Z Score	LM Z score
SMIM1-/-	149-493	-1.70161	-2.31621
SMIM1-/-	149-494	-0.165826	-0.291683
SMIM1-/-	149-496	-1.24854	0.988684
SMIM1-/-	149-497	-1.63448	0.380286
SMIM1-/-	149-499	-1.50072	-0.119651
SMIM1-/-	149-500	-1.62326	1.63335
SMIM1-/-	149-501	-0.966171	-1.20329
SMIM1-/-	149-502	0.0187354	-0.198162
SMIM1-/-	149-503	-0.0371526	1.19214
SMIM1-/-	149-505	-0.264787	-1.13702
SMIM1-/-	149-506	-2.66372	2.39129
SMIM1-/-	149-509	-1.49473	-0.871756
SMIM1+/+	CM149-01	0.525289	-0.727188
SMIM1+/+	MC149-02	-0.0832008	-1.60131
SMIM1+/+	CR149-03	0.769812	0.591806
SMIM1+/+	MA149-04	0.777803	-1.81898
SMIM1+/+	AH149-05	-0.573141	-0.0812641
SMIM1+/+	LB149-06	0.858717	-1.13793
SMIM1+/+	OC149-07	0.898387	-1.15588
SMIM1+/+	TM149-08	0.218973	0.229085
SMIM1+/+	AW149-09	0.880691	0.551321
SMIM1+/+	ES149-10	0.761176	-1.10228
SMIM1+/+	SC149-11	0.431089	-0.952053
SMIM1+/+	MR149-12	-0.256293	-1.30572
SMIM1+/+	JH149-13	0.460071	-0.237676
SMIM1+/+	NAA149-14	-0.174439	-0.154691
SMIM1+/+	DH149-15	0.900499	-0.432211
SMIM1+/+	SN149-16	1.88444	0.686571
SMIM1+/+	JW149-17	-0.156846	0.373939
SMIM1+/+	CH149-18	-0.363559	-1.58496
SMIM1+/+	AW149-19	-0.22131	-0.214997
SMIM1+/+	RB149-20	1.94427	0.894174
SMIM1+/+	CMH149-21	1.37186	-0.144711
SMIM1+/+	SH149-22	1.314	0.252601
SMIM1+/+	KL149-23	1.21933	-1.92817
SMIM1+/+	SC149-24	-0.291494	-0.35669
SMIM1+/+	HL149-25	1.2962	-0.627144
SMIM1+/+	RP149-26	1.92568	0.895539
SMIM1+/+	RM149-28	-0.87324	-0.637217
SMIM1+/+	DS149-29	1.52587	-1.30846
SMIM1+/+	AM149-27	-0.469902	-0.267718
SMIM1+/+	CK149-30	0.998927	0.74773
SMIM1+/+	VG149-31	0.351272	0.917327
SMIM1+/+	AK149-32	0.483713	-1.37397
SMIM1+/+	MG149-33	1.12635	-0.470891
SMIM1+/+	CP149-34	0.252094	1.89328
SMIM1+/+	DH149-35	0.640475	0.0516159
SMIM1+/+	JS149-36	-0.603436	0.376654
SMIM1+/+	MC149-37	0.635688	0.704961
SMIM1+/+	KH149-38	-1.36155	0.152108
SMIM1+/+	YS149-39	-0.714054	-1.1104
SMIM1+/+	PW149-40	-1.75269	0.498429
SMIM1+/+	DT149-51	0.45821	0.108866
SMIM1+/+	LY149-42	-0.505425	0.0726663
SMIM1+/+	RS149-50	-0.472922	-0.904231
SMIM1+/+	SRR149-53	-0.733959	-0.0211294
SMIM1+/+	CT149-54	-0.109465	-0.48136
SMIM1+/+	MA149-49	-0.181121	-1.43503
SMIM1+/+	KD149-41	1.023	1.71033
SMIM1+/+	BB149-46	-0.710854	1.3044
SMIM1+/+	HC149-44	0.317847	0.337838
SMIM1+/+	DW149-45	1.3679	-1.41415
SMIM1+/+	EB149-43	-0.952934	2.88112
SMIM1+/+	MC149-47	-0.29837	0.157983
SMIM1+/+	LB149-52	1.67587	-0.165778
SMIM1+/+	WV149-66	0.686603	0.223392
SMIM1+/+	ET149-67	-1.15439	-0.226441
SMIM1+/+	PS149-68	-0.787375	-1.16672
SMIM1+/+	JC149-48	-0.272575	0.0817219
SMIM1+/+	MF149-69	-0.433539	-1.96056
SMIM1+/+	CK149-72	-0.987178	-1.38748
SMIM1+/+	JM149-75	-1.18283	1.81684
SMIM1+/+	JG149-86	0.282317	1.58138
SMIM1+/+	PRB149-82	-0.407014	0.256668
SMIM1+/+	EC149-80	-0.767219	0.970677
SMIM1+/+	MC149-90	-0.415603	0.613268
SMIM1+/+	MW149-78	-0.34187	1.53363
SMIM1+/+	CT149-88	1.07201	1.02944
SMIM1+/+	RR149-77	-0.807153	0.821715
SMIM1+/+	OK149-93	-1.63195	0.507504
SMIM1+/+	AEK149-97	-1.00629	0.381774
SMIM1+/+	KEK149-98	0.701671	0.443388
SMIM1+/+	TW149-94	0.639287	-1.63752
SMIM1+/+	SL149-96	-0.848525	-1.36119
SMIM1+/+	LM149-95	0.438739	0.375641
SMIM1+/+	UN149-100	0.0404235	0.864214
SMIM1+/+	JF149-101	0.0231852	1.10277
SMIM1+/+	NW149-99	-0.74784	1.36405
SMIM1+/+	GF149-102	-1.54902	-0.876098
SMIM1+/+	SF149-112	0.087063	-0.109832
SMIM1+/+	PM149-109	-0.295348	1.17396
SMIM1+/+	NS149-106	0.343508	-1.00264
SMIM1+/+	LH149-111	0.820922	1.36934
SMIM1+/+	SPH149-113	-0.97638	0.644886
SMIM1+/+	LP149-114	-0.674803	-0.726078
SMIM1+/+	PR149-103	-0.550681	-0.283356
SMIM1+/+	PK149-118	1.60423	-0.963278
SMIM1+/+	AH149-105	0.142407	-0.870856
SMIM1+/+	PS149-117	1.43012	0.744317
SMIM1+/+	SB149-124	0.744143	1.23726
SMIM1+/+	GM149-127	0.867288	-2.02122
SMIM1+/+	DC149-125	-0.502653	1.0654
SMIM1+/+	PK149-118	2.02142	-1.28005
SMIM1+/+	GR149-132	0.210095	-0.505453
SMIM1+/+	PH149-130	0.174614	0.744517
SMIM1+/+	JS149-128	-0.275315	-1.05262
SMIM1+/+	MG149-156	0.0641995	-0.3599
SMIM1+/+	HP149-131	1.03417	0.652462
SMIM1+/+	LJ149-134	-0.719028	-0.780183
SMIM1+/+	TW149-152	-1.12865	0.658097
SMIM1+/+	SG149-137	-0.537579	0.884999
SMIM1+/+	AW149-135	0.548348	-0.814736
SMIM1+/+	JW149-161	0.0371073	1.79446
SMIM1+/+	RN149-146	-0.307808	-0.230756
SMIM1+/+	HH149-138	0.515673	0.979593
SMIM1+/+	AJ149-126	0.720642	0.0221387
SMIM1+/+	BH149-145	0.968876	-1.72343
SMIM1+/+	CH149-164	0.127227	-0.412336
SMIM1+/+	FF149-148	0.584089	-0.0195463
SMIM1+/+	SH149-160	-1.66734	1.24029
SMIM1+/+	HJ 149-154	0.284651	-0.393613
SMIM1+/+	IS 149-151	-0.709129	-0.108183
SMIM1+/+	BN149-174	-1.01979	0.255643
SMIM1+/+	LS 149-155	0.0852687	-0.952063
SMIM1+/+	LH149-181	0.42938	0.256878
SMIM1+/+	APVS149-182	0.709381	-0.775242
SMIM1+/+	TM149-158	-2.02871	0.382164
SMIM1+/+	LW149-184	0.133791	-0.88531
SMIM1+/+	TC149-180	0.249215	0.268001
SMIM1+/+	RB149-169	0.00653216	-1.54729
SMIM1+/+	SCJ149-165	-1.41903	0.138231
SMIM1+/+	AB149-185	0.272089	-1.155
SMIM1+/+	SJ149-168	-0.959307	-0.581951
SMIM1+/+	MN149-179	-0.963563	0.526519
SMIM1+/+	IK149-187	0.12518	-0.455523
SMIM1+/+	EL149-173	-2.02146	0.917939
SMIM1+/+	TL149-177	-0.496895	0.106389
SMIM1+/+	DC149-188	2.12573	-0.881768
SMIM1+/+	IT149-186	-0.297914	-0.00352069
SMIM1+/+	PK149-153	-1.07676	1.81252
SMIM1+/+	MJ149-167	0.179748	0.0943925
SMIM1+/+	PC149-136	-0.256668	1.50703
SMIM1+/+	WM149-190	-1.50579	-0.585941
SMIM1+/+	JC149-133	1.41883	-0.123858
SMIM1+/+	AC149-191	-0.957375	-0.0957874
SMIM1+/+	JVV149-196	0.261415	0.970986
SMIM1+/+	LW149-193	-0.645737	0.827144
SMIM1+/+	CT149-194	1.05008	1.18075
SMIM1+/+	DT149-195	-1.71414	0.377641
SMIM1+/+	SG149-197	-1.26254	-0.583838
SMIM1+/+	NM149-192	-2.42071	0.768165
SMIM1+/+	PMS149-139	0.0353956	-0.324187
SMIM1+/+	SC149-199	0.757897	-0.10368
SMIM1+/+	RM149-159	-0.467577	-0.0692573
SMIM1+/+	CT149-157	0.0793211	-0.0697372
SMIM1+/+	JW149-149	0.223054	0.732755
SMIM1+/+	MS149-198	-0.301221	1.61949
SMIM1+/+	SC149-213	-0.0911888	2.47268
SMIM1+/+	NW149-212	-0.971478	1.84754
SMIM1+/+	JD149-210	-0.0100325	-0.130668
SMIM1+/+	DC149-201	-0.439353	-0.495076
SMIM1+/+	AC149-218	0.15908	0.675365
SMIM1+/+	TG149-217	0.792507	-0.146501
SMIM1+/+	CF149-215	-0.166389	-0.0315246
SMIM1+/+	JD149-222	-0.365952	-1.55068
SMIM1+/+	GB149-225	1.86349	-0.0207513
SMIM1+/+	CP149-223	0.59211	0.125588
SMIM1+/+	JS149-226	-0.341326	0.337353
SMIM1+/+	SP149-219	-0.68139	-2.36558
SMIM1+/+	PB149-227	-0.738031	-0.298529
SMIM1+/+	CP149-235	0.890749	-1.03564
SMIM1+/+	VM149-214	0.436447	1.80105
SMIM1+/+	MTC 149-237	-0.865557	0.689936
SMIM1+/+	SH149-230	-0.162779	-0.932966
SMIM1+/+	AN149-231	-3.48487	-1.70544
SMIM1+/+	MB149-234	-0.780971	0.160208
SMIM1+/+	DJ149-232	-2.0997	1.49487
SMIM1+/+	HB149-239	-0.264005	-0.262839
SMIM1+/+	RL149-238	-3.29881	0.911639
SMIM1+/+	KM149-244	0.0642606	-0.717998
SMIM1+/+	MW149-243	-0.169163	-0.588653
SMIM1+/+	LW149-193	-0.841681	0.491392
SMIM1+/+	NM149-249	-1.04056	1.9314
SMIM1+/+	NB149-296	-0.703613	-0.42472
SMIM1+/+	RG149-253	0.680669	1.40477
SMIM1+/+	MC149-297	0.156649	1.05969
SMIM1+/+	JA149-302	0.351522	0.65951
SMIM1+/+	EB149-307	0.132493	1.04834
SMIM1+/+	AM149-319	0.991667	1.36497
SMIM1+/+	JB149-321	0.38937	0.299383
SMIM1+/+	CS149-328	2.61784	-1.25232
SMIM1+/+	TZ149-330	-2.37176	1.69987
SMIM1+/+	YH149-331	-0.678564	-0.704431
SMIM1+/+	LB149-333	0.279334	0.792466
SMIM1+/+	KC149-334	-1.13347	0.310274
SMIM1+/+	AW149-335	-3.14986	-0.768191
SMIM1+/+	CT149-337	-0.2416	2.27657
SMIM1+/+	MC149-338	0.922419	1.91279
SMIM1+/+	MP149-339	-0.888991	-1.1692
SMIM1+/+	MVE149-340	0.465897	-0.0898629
SMIM1+/+	149-341	0.758322	-0.048528
SMIM1+/+	SC149-345	-0.0157181	1.40133
SMIM1+/+	GG149-344	1.54718	-0.59962
SMIM1+/+	MFL149-346	-0.240295	-0.511511
SMIM1+/+	AG149-347	2.35751	-0.0877106
SMIM1+/+	DH149-348	0.056219	-0.4062
SMIM1+/+	JL149-349	0.118793	0.49521
SMIM1+/+	EDP149-350	-0.51401	-0.855188
SMIM1+/+	FC149-351	-0.995107	-0.308487
SMIM1+/+	MA149-352	-0.814415	-0.333439
SMIM1+/+	FA149-353	0.329191	-0.551536
SMIM1+/+	GC149-354	-0.162367	-0.0902806
SMIM1+/+	JM149-355	-0.589893	-0.682703
SMIM1+/+	MO149-356	-1.04458	-0.284409
SMIM1+/+	EW149-357	0.428002	-0.473298
SMIM1+/+	DF149-358	-0.806461	4.75154
SMIM1+/+	AL149-359	0.126792	-0.691269
SMIM1+/+	HB149-360	-0.11777	0.429027
SMIM1+/+	JW149-361	0.684973	0.363784
SMIM1+/+	KP149-362	-0.164217	0.724963
SMIM1+/+	SP149-363	0.190907	0.517418
SMIM1+/+	TMA149-364	0.771229	-1.37774
SMIM1+/+	ELS149-365	-1.49174	-0.0998884
SMIM1+/+	AE149-367	0.109148	-0.228291
SMIM1+/+	JE149-366	-0.028244	1.04563
SMIM1+/+	AR149-368	-0.0735705	1.11362
SMIM1+/+	PK149-369	2.79606	-0.817032
SMIM1+/+	MF149-370	0.813257	0.0796726
SMIM1+/+	EA149-372	0.249834	-0.831199
SMIM1+/+	OA149-371	0.661701	0.295252
SMIM1+/+	IW149-373	0.695765	-0.470468
SMIM1+/+	JC149-374	-0.485928	0.966715
SMIM1+/+	149-376	0.27	-1.91708
SMIM1+/+	149-377	2.00073	0.675939
SMIM1+/+	149-378	1.00941	-0.0894265
SMIM1+/+	149-379	0.326898	-0.529031
SMIM1+/+	149-380	0.105646	-0.694461
SMIM1+/+	149-381	0.0209833	-0.982631
SMIM1+/+	149-383	2.20869	-0.178276
SMIM1+/+	149-384	-0.45944	-0.196917
SMIM1+/+	149-385	-0.815859	-0.294278
SMIM1+/+	149-387	0.35905	-1.22101
SMIM1+/+	149-388	0.328411	-1.57943
SMIM1+/+	149-389	0.369646	0.334519
SMIM1+/+	149-390	1.02391	-0.506865
SMIM1+/+	149-391	-0.0667637	-1.20374
SMIM1+/+	149-392	-0.763079	0.595473
SMIM1+/+	149-395	0.897361	-0.454497
SMIM1+/+	149-396	1.13518	2.47112
SMIM1+/+	149-398	1.61586	-0.769426
SMIM1+/+	149-399	0.251167	-1.08557
SMIM1+/+	149-402	0.7725	-1.19433
SMIM1+/+	149-403	0.526978	-0.0713134
SMIM1+/+	149-406	2.20086	-0.448356
SMIM1+/+	149-407	-0.439046	0.245227
SMIM1+/+	149-392	-0.417162	-0.0503524
SMIM1+/+	149-20	2.15671	0.880342
SMIM1+/+	149-404	2.56526	-0.967702
SMIM1+/+	149-405	-0.730852	-0.605687
SMIM1+/+	149-411	1.16266	1.38891
SMIM1+/+	149-413	-0.910916	0.71579
SMIM1+/+	149-414	0.4103	-0.698281
SMIM1+/+	149-415	0.27315	-0.99098
SMIM1+/+	149-416	-0.289827	-1.52381
SMIM1+/+	149-417	0.186555	-0.604594
SMIM1+/+	149-418	0.930096	-0.329419
SMIM1+/+	149-419	-0.227669	1.38914
SMIM1+/+	149-421	0.219307	1.08041
SMIM1+/+	149-425	0.794637	0.75437
SMIM1+/+	149-426	-0.753848	-0.292814
SMIM1+/+	149-427	0.309778	0.146911
SMIM1+/+	149-428	0.407014	-0.983394
SMIM1+/+	149-432	0.209699	-1.71662
SMIM1+/+	149-435	-1.47449	-0.30898
SMIM1+/+	149-437	0.279592	1.39738
SMIM1+/+	149-438	-0.647	0.403218
SMIM1+/+	149-440	-1.66668	-0.638078
SMIM1+/+	149-448	-0.457563	-0.0416607
SMIM1+/+	149-449	-0.295679	0.642324
SMIM1+/+	149-451	0.580474	-0.230854
SMIM1+/+	149-452	-0.7983	-0.42878
SMIM1+/+	149-450	0.821507	0.855691
SMIM1+/+	149-453	0.191012	0.871542
SMIM1+/+	149-454	-0.816526	-2.73346
SMIM1+/+	149-455	0.207567	0.308199
SMIM1+/+	149-457	-1.11121	-1.17801
SMIM1+/+	149-458	1.28811	0.711558
SMIM1+/+	149-459	-1.21876	-0.820656
SMIM1+/+	149-460	-0.0972817	0.685167
SMIM1+/+	149-461	0.188168	0.150685
SMIM1+/+	149-463	0.249404	-0.0572728
SMIM1+/+	149-464	-0.780062	0.776935
SMIM1+/+	149-465	-1.06498	-0.568455
SMIM1+/+	149-466	-2.19484	-2.21845
SMIM1+/+	149-467	0.762084	0.631745
SMIM1+/+	149-471	-1.04942	0.760256
SMIM1+/+	149-472	-2.47799	-0.103892
SMIM1+/+	149-473	0.122859	0.500125
SMIM1+/+	149-474	-0.849083	-1.04036
SMIM1+/+	149-475	-0.0347541	-0.725063
SMIM1+/+	149-476	-0.23398	0.198407
SMIM1+/+	149-477	-1.23834	-0.633756
SMIM1+/+	149-478	1.10388	0.846089
SMIM1+/+	149-479	-0.212323	-1.63544
SMIM1+/+	149-480	0.148026	1.15252
SMIM1+/+	149-481	-0.385248	1.41598
SMIM1+/+	149-482	-0.775297	0.583144
SMIM1+/+	149-483	-0.420429	-0.0284622
SMIM1+/+	149-484	0.968153	1.25334
SMIM1+/+	149-485	-0.00230748	-0.404427
SMIM1+/+	149-486	-0.474693	-0.454624
SMIM1+/+	149-487	-0.998696	-0.505157
SMIM1+/+	149-488	0.353365	-0.559826
SMIM1+/+	149-490	-1.02508	0.112421
SMIM1+/+	149-491	-0.860958	-0.684539
SMIM1+/+	149-498	-0.476745	-1.02254
SMIM1+/+	149-495	0.984273	-0.985587
SMIM1+/+	149-507	0.640774	-0.00155702
SMIM1+/+	149-508	0.0607629	2.38053
SMIM1+/+	149-510	1.32774	0.964443
SMIM1+/+	149-511	0.367244	-0.784085
SMIM1+/+	149-512	0.272221	0.0959424
