# Supplementary material for: Loss of function variant in SMIM1 is associated with reduced energy expenditure and weight gain
Source: Research Square preprint supplement (doi:10.21203/rs.3.rs-1239303/v1), 2022-01-24
Supplement: Supplementary file 7 [file d8fafa237ab657b84179cbde.xlsx]

## Sheet: Corrected for BMI
Disease	effect (OR)	CI_low	CI_high	effect (log(OR))	sd	log(CI_low)	log(CI_high)	p.val	p.val.FDR
Central_nervous_system_bleeding	5.52537	2.22798	13.7029	1.70935	0.463404	0.801094	2.6176	0.00022542	0.000688443
Sarcoidosis	10.5419	2.58731	42.9527	2.35536	0.716717	0.95062	3.7601	0.00101507	0.00304521
Ischemic stroke	3.45599	1.3817	8.64433	1.24011	0.467761	0.323314	2.1569	0.00802163	0.0232422
T1D	3.41475	1.07241	10.8732	1.2281	0.590926	0.0699103	2.3863	0.0376845	0.103442
Renal_disease	1.96216	1.01786	3.78252	0.674048	0.334875	0.0177043	1.33039	0.0441323	0.120652
Cholelithiasis	1.98546	0.983638	4.00763	0.685852	0.358348	-0.0164974	1.3882	0.0556295	0.147909
T2D	1.73779	0.906688	3.3307	0.552612	0.331929	-0.0979568	1.20318	0.0959426	0.24272
IBD	1.97258	0.857322	4.53864	0.679344	0.425153	-0.153941	1.51263	0.11007	0.276397
Other_haematological_malignancy	3.01746	0.738496	12.3292	1.10441	0.718153	-0.30314	2.51197	0.124084	0.304816
VEL_limetabolism	1.49847	0.885524	2.53569	0.404445	0.268383	-0.121575	0.930466	0.131818	0.321484
thyroid_hyper	2.80304	0.686195	11.4501	1.0307	0.718022	-0.376594	2.438	0.151151	0.360848
Stroke_NOS	2.77484	0.676765	11.3773	1.02059	0.719924	-0.390432	2.43162	0.156296	0.371819
Other_eye_bleeding	3.96605	0.550436	28.5765	1.37777	1.00758	-0.597044	3.35258	0.171497	0.398202
Dyslipidaemia_new	1.46142	0.846666	2.52253	0.379407	0.278503	-0.166449	0.925264	0.1731	0.400553
vte	1.68634	0.773101	3.67834	0.522558	0.397917	-0.257346	1.30246	0.189105	0.434621
ulcerative_colitis	2.41773	0.594776	9.82792	0.882828	0.715523	-0.519571	2.28523	0.217269	0.486642
VEL_hyperthyroidism	2.42421	0.593453	9.90269	0.885505	0.718024	-0.521797	2.29281	0.217482	0.486642
VEL_hypothrodism	0.495034	0.154724	1.58385	-0.703128	0.59337	-1.86611	0.459856	0.236028	0.522963
Jaundice	3.18386	0.44204	22.9322	1.15809	1.00739	-0.816354	3.13254	0.250309	0.545691
thyroid_hypo	0.512668	0.160227	1.64035	-0.668127	0.593398	-1.83116	0.494911	0.260193	0.563534
MS	3.02716	0.420611	21.7866	1.10762	1.00699	-0.866046	3.08129	0.271362	0.57675
Arthritis_new	1.36457	0.773517	2.40726	0.31084	0.289622	-0.256808	0.878488	0.283153	0.592525
VEL_obesity	1.45143	0.699155	3.01312	0.372547	0.372675	-0.357883	1.10298	0.317477	0.640624
Liver_disease_new	1.61467	0.589264	4.42445	0.479133	0.514302	-0.52888	1.48715	0.351534	0.692849
Bleeding_after_tooth_extraction_or_other_procedure	1.7136	0.540839	5.42941	0.538598	0.588395	-0.614634	1.69183	0.359998	0.703397
Infections_new	0.712137	0.342906	1.47894	-0.339485	0.372871	-1.0703	0.391328	0.362579	0.706403
Gout	1.6984	0.521858	5.52749	0.529687	0.602076	-0.65036	1.70973	0.378985	0.727909
pe	1.50617	0.473687	4.78913	0.409569	0.590204	-0.747209	1.56635	0.487716	0.863373
Other_haematuria	0.666028	0.209686	2.11551	-0.406424	0.589664	-1.56214	0.749296	0.490668	0.864085
dvt	1.42431	0.519242	3.90694	0.353684	0.514841	-0.655385	1.36275	0.492097	0.864356
AF	1.27639	0.60049	2.71305	0.244033	0.384722	-0.510009	0.998075	0.525879	0.905625
Coeliac_disease	1.82162	0.253353	13.0976	0.599728	1.0065	-1.37297	2.57243	0.551271	0.927448
Gastrointestinal_bleeding	0.782385	0.341222	1.79392	-0.245408	0.423382	-1.07522	0.584405	0.562159	0.934518
Epistaxis	1.43421	0.351817	5.84668	0.360615	0.716982	-1.04464	1.76587	0.61499	0.990896
Abdo_pain_new	0.77613	0.284461	2.11761	-0.253435	0.512113	-1.25716	0.750287	0.620684	0.991347
Menorrhagia	0.706276	0.167221	2.98304	-0.347749	0.735061	-1.78844	1.09294	0.63615	0.997015
VEL_ischemic_heart_disease	1.16598	0.616479	2.20527	0.153559	0.325154	-0.483731	0.79085	0.636737	0.997015
TIA	1.39325	0.340037	5.70865	0.33164	0.719575	-1.0787	1.74198	0.644883	0.999667
Eczema_new	1.28273	0.405442	4.05826	0.248989	0.587646	-0.902777	1.40075	0.671781	0.999667
Non-haematological_malignancy	0.882723	0.493028	1.58044	-0.124744	0.297172	-0.70719	0.457702	0.674653	0.999667
CALIBER_DVT	1.32582	0.324797	5.41198	0.28203	0.717658	-1.12455	1.68862	0.694329	0.999667
CALIBER_PE	1.31978	0.323083	5.39122	0.277463	0.718028	-1.12985	1.68477	0.699183	0.999667
Exanthema	1.45273	0.202107	10.4421	0.373441	1.00635	-1.59896	2.34584	0.710573	0.999667
RA	1.14956	0.281574	4.69321	0.139378	0.717737	-1.26736	1.54612	0.846027	0.999667
IHD	0.936427	0.457075	1.91849	-0.0656838	0.365937	-0.782907	0.65154	0.857549	0.999667
psoriasis	9.3131e-05	1.60709e-52	5.39693e+43	-9.2815	56.1125	-119.26	100.697	0.868622	0.999667
CAD_new	0.943208	0.460191	1.9332	-0.0584689	0.366152	-0.776114	0.659176	0.873129	0.999667
Cataract	1.05164	0.531234	2.08183	0.0503467	0.348424	-0.632552	0.733246	0.885107	0.999667
Other_respiratory_system_bleeding	5.21577e-05	4.48509e-83	6.06548e+73	-9.86124	91.7122	-189.614	169.891	0.914373	0.999667
Myalgia	6.61338e-05	1.07649e-83	4.06291e+74	-9.62383	92.5614	-191.041	171.793	0.917191	0.999667
thrombocytopenia_unspecified	7.91019e-05	7.86622e-83	7.9544e+73	-9.44477	91.638	-189.052	170.162	0.917911	0.999667
Haemangioma	7.38403e-05	5.95534e-84	9.15546e+74	-9.51361	92.9197	-191.633	172.606	0.918451	0.999667
chron	8.52497e-05	5.37709e-84	1.35157e+75	-9.36993	93.0451	-191.735	172.995	0.919786	0.999667
Pulmonary_hypertension	0.000147887	3.84386e-80	5.68973e+71	-8.81906	88.7982	-182.86	165.222	0.920888	0.999667
vasculitis	0.000163607	4.56372e-81	5.86526e+72	-8.71804	89.937	-184.991	167.555	0.922778	0.999667
Muscle_weakness	0.000171649	4.71578e-83	6.2478e+74	-8.67006	92.2943	-189.564	172.224	0.925157	0.999667
Hearing_loss	1.04977	0.329751	3.34197	0.0485704	0.590821	-1.10942	1.20656	0.934481	0.999667
Other_obstetric_bleeding	8.14638e-05	1.41987e-106	4.67392e+97	-9.41535	119.547	-243.723	224.893	0.937225	0.999667
Other_gynaecological_bleeding	2.08216e-05	3.52824e-123	1.22877e+113	-10.7795	138.358	-281.957	260.398	0.9379	0.999667
other_connective_tissue	7.4203e-05	2.53895e-130	2.16864e+121	-9.50871	147.398	-298.404	279.387	0.948564	0.999667
Ataxia	7.66154e-05	2.41718e-134	2.42842e+125	-9.47671	152.139	-307.664	288.71	0.950332	0.999667
ankylosing_spondilytis	7.77403e-05	3.1691e-134	1.90702e+125	-9.46214	152.008	-307.393	288.469	0.950366	0.999667
thyrotoxicosis	8.65597e-05	9.84962e-133	7.60698e+123	-9.35468	150.31	-303.956	285.247	0.950375	0.999667
Aplastic_anaemia	9.00334e-05	2.36895e-132	3.42177e+123	-9.31533	149.882	-303.079	284.448	0.950443	0.999667
VEL_haemochromatosis	7.7666e-05	1.62053e-134	3.72224e+125	-9.46309	152.35	-308.064	289.137	0.950472	0.999667
Splenomegaly_new	0.000104365	5.21706e-132	2.08779e+123	-9.16761	149.555	-302.289	283.954	0.951121	0.999667
Splenomegaly	0.000104365	5.21706e-132	2.08779e+123	-9.16761	149.555	-302.289	283.954	0.951121	0.999667
SLE	0.000142444	6.99068e-132	2.90248e+123	-8.85656	149.564	-301.997	284.284	0.95278	0.999667
Hepatomegaly	0.000129481	7.27324e-134	2.30507e+125	-8.95198	151.845	-306.562	288.658	0.952988	0.999667
Myelodysplastic_syndrome	0.0001843	5.58319e-129	6.0837e+120	-8.59895	146.286	-295.314	278.116	0.953126	0.999667
thyroiditis	0.000195398	9.33736e-129	4.08897e+120	-8.54047	146.053	-294.799	277.719	0.95337	0.999667
Idiopathic_thrombocytopenic_purpura	0.000143286	5.85286e-134	3.50786e+125	-8.85067	152.007	-306.779	289.078	0.953569	0.999667
Hyposplenism	0.000148552	3.266e-134	6.75681e+125	-8.81457	152.323	-307.363	289.734	0.953854	0.999667
Hereditary_deficiency_of_other_clotting_factors	0.00019526	6.52933e-134	5.83927e+125	-8.54118	152.109	-306.67	289.588	0.955221	0.999667
Skin_ulcer	7.71377e-05	1.53689e-214	3.8716e+205	-9.46992	246.358	-492.323	473.384	0.969337	0.999667
Acute_myeloid_leukaemia	7.65263e-05	9.66106e-215	6.06173e+205	-9.47788	246.591	-492.788	473.832	0.96934	0.999667
autoimmune_hepatatis	0.000100214	1.8128e-212	5.54002e+203	-9.2082	244.058	-487.553	469.137	0.969903	0.999667
blistering_disorder	8.28268e-05	5.35286e-218	1.28161e+209	-9.39876	250.457	-500.286	481.488	0.970065	0.999667
systemic_sclerosis	0.000113231	3.89036e-213	3.29563e+204	-9.08608	244.906	-489.092	470.92	0.970405	0.999667
immunodeficiency	8.57256e-05	6.43102e-220	1.14272e+211	-9.36436	252.731	-504.708	485.979	0.970443	0.999667
Cutaneous_bruising_or_bleeding	9.00664e-05	8.10743e-219	1.00056e+210	-9.31496	251.463	-502.173	483.543	0.970451	0.999667
Haemarthrosis	9.62687e-05	1.01715e-217	9.1114e+208	-9.24837	250.206	-499.644	481.147	0.970515	0.999667
lupus_erythematosus	0.000130683	3.38007e-215	5.05256e+206	-8.94274	247.4	-493.838	475.952	0.971165	0.999667
Pallor	0.000118264	4.14895e-218	3.37107e+209	-9.04259	250.769	-500.541	482.456	0.971235	0.999667
secondary_thrombocytopenia	0.000145618	1.76226e-215	1.20326e+207	-8.83452	247.788	-494.489	476.82	0.971559	0.999667
reactive_arthropaties	0.000134823	8.34688e-220	2.17773e+211	-8.91155	252.829	-504.447	486.624	0.971882	0.999667
von_Willebrand_disease	0.000194352	1.79821e-218	2.10056e+210	-8.54584	251.449	-501.377	484.285	0.972888	0.999667
autoimmune_haemolytic_anemia	0.000211479	5.65776e-217	7.90481e+208	-8.46138	249.732	-497.928	481.005	0.972971	0.999667
vitiligo	0.000200337	4.79932e-219	8.36266e+210	-8.51551	252.138	-502.698	485.667	0.973058	0.999667
Dermatopolymyositis	0.000226347	1.84576e-217	2.77571e+209	-8.39344	250.339	-499.048	482.261	0.973253	0.999667

## Sheet: Not corrected for BMI
Disease	effect (OR)	CI_low	CI_high	effect (log(OR))	sd	log(CI_low)	log(CI_high)	p.val	p.val.FDR
Central_nervous_system_bleeding	5.49649	2.2165	13.6303	1.70411	0.463367	0.795927	2.61229	0.000235376	0.000715627
Sarcoidosis	11.2347	2.76118	45.712	2.41901	0.716009	1.01566	3.82236	0.000728921	0.00220629
Ischemic stroke	3.5843	1.43375	8.96059	1.27656	0.467494	0.360293	2.19284	0.00632087	0.0185522
Renal_disease	2.13217	1.11255	4.08626	0.757141	0.331888	0.106652	1.40763	0.0225299	0.0644527
T1D	3.7203	1.17382	11.7911	1.3138	0.588552	0.160263	2.46734	0.0255975	0.0721567
Cholelithiasis	2.20226	1.10083	4.40571	0.789483	0.353791	0.096064	1.4829	0.0256486	0.0721567
T2D	1.98525	1.06739	3.6924	0.685745	0.316603	0.0652137	1.30628	0.0303155	0.0838936
VEL_limetabolism	1.62891	0.967698	2.7419	0.487908	0.26569	-0.0328351	1.00865	0.0663015	0.174234
VEL_obesity	1.77494	0.943871	3.33774	0.573764	0.322215	-0.057766	1.20529	0.0749637	0.195482
Dyslipidaemia_new	1.59172	0.927082	2.73285	0.464816	0.275785	-0.0757132	1.00535	0.0919062	0.234257
IBD	2.01597	0.876515	4.63671	0.701102	0.424958	-0.131801	1.53401	0.0989812	0.249477
Other_haematological_malignancy	3.08009	0.753877	12.5843	1.12496	0.718118	-0.282526	2.53245	0.117223	0.292195
vte	1.81863	0.836768	3.95263	0.598086	0.396076	-0.178209	1.37438	0.131036	0.320731
thyroid_hyper	2.93538	0.719206	11.9805	1.07684	0.717587	-0.329607	2.48328	0.133449	0.324296
Stroke_NOS	2.89018	0.70571	11.8365	1.06132	0.719334	-0.34855	2.47119	0.1401	0.336837
Other_eye_bleeding	4.11552	0.571332	29.6456	1.41476	1.00744	-0.559785	3.38931	0.160225	0.379835
Arthritis_new	1.48668	0.847662	2.60743	0.396546	0.286648	-0.165273	0.958365	0.166545	0.390752
hyperthyroidism	2.53054	0.619936	10.3295	0.928433	0.717652	-0.47814	2.33501	0.195766	0.4469
ulcerative_colitis	2.42851	0.597444	9.87146	0.887277	0.715509	-0.515095	2.28965	0.214952	0.484177
Jaundice	3.33144	0.462693	23.9868	1.20341	1.00721	-0.770692	3.1775	0.232169	0.516101
Liver_disease_new	1.76519	0.646716	4.818	0.568256	0.512307	-0.435848	1.57236	0.26734	0.571308
VEL_hypothrodism	0.540561	0.169493	1.724	-0.615148	0.591743	-1.77494	0.544646	0.298547	0.611526
Gout	1.85897	0.576082	5.99877	0.620024	0.59773	-0.551506	1.79155	0.299597	0.611828
MS	2.80743	0.390152	20.2016	1.03227	1.0069	-0.941218	3.00576	0.30527	0.621542
thyroid_hypo	0.559901	0.175553	1.78573	-0.579995	0.591756	-1.73982	0.579826	0.327025	0.654512
Bleeding_after_tooth_extraction_or_other_procedure	1.77924	0.561824	5.63465	0.576184	0.588149	-0.576567	1.72893	0.327256	0.654512
dvt	1.53907	0.562779	4.209	0.431178	0.513298	-0.574868	1.43722	0.4009	0.755028
pe	1.62759	0.513112	5.16271	0.4871	0.588971	-0.667262	1.64146	0.408217	0.76036
AF	1.3706	0.64636	2.90634	0.315248	0.3835	-0.436398	1.06689	0.411061	0.763559
Infections_new	0.747131	0.36017	1.54984	-0.291515	0.372284	-1.02118	0.438149	0.433601	0.792403
ischemic_heart_disease	1.26034	0.6685	2.37614	0.231378	0.323525	-0.402719	0.865476	0.474499	0.852896
Other_haematuria	0.684027	0.215383	2.17238	-0.379758	0.589592	-1.53534	0.775821	0.519508	0.900836
Epistaxis	1.50093	0.368357	6.11577	0.406084	0.716741	-0.998703	1.81087	0.571007	0.941953
Coeliac_disease	1.68418	0.234386	12.1017	0.521278	1.00617	-1.45079	2.49334	0.604403	0.98506
TIA	1.4389	0.351242	5.89463	0.363881	0.719483	-1.04628	1.77404	0.61303	0.990896
Gastrointestinal_bleeding	0.807623	0.352374	1.85103	-0.21366	0.423172	-1.04306	0.615742	0.613628	0.990896
CALIBER_PE	1.43163	0.351193	5.83601	0.358813	0.716969	-1.04642	1.76405	0.616752	0.990896
CALIBER_DVT	1.42917	0.350815	5.82228	0.357097	0.716643	-1.0475	1.76169	0.618278	0.991
Eczema_new	1.32259	0.418175	4.18303	0.27959	0.587483	-0.871855	1.43104	0.634137	0.997015
Abdo_pain_new	0.795633	0.291698	2.17016	-0.228618	0.511958	-1.23204	0.774802	0.655196	0.999667
Exanthema	1.53068	0.213079	10.9958	0.425709	1.00604	-1.54609	2.39751	0.672184	0.999667
Non-haematological_malignancy	0.888252	0.496122	1.59032	-0.1185	0.297165	-0.700933	0.463933	0.690064	0.999667
Menorrhagia	0.759253	0.18029	3.19743	-0.27542	0.733569	-1.71319	1.16235	0.707324	0.999667
RA	1.22036	0.299331	4.9754	0.199149	0.717032	-1.20621	1.60451	0.781211	0.999667
Cataract	1.08131	0.546558	2.13924	0.0781689	0.34811	-0.604115	0.760453	0.822328	0.999667
psoriasis	9.84835e-05	1.08619e-52	8.92936e+43	-9.22562	56.3409	-119.652	101.201	0.869931	0.999667
Hearing_loss	1.07974	0.339232	3.43668	0.0767173	0.590719	-1.08107	1.23451	0.896668	0.999667
Other_respiratory_system_bleeding	5.39336e-05	3.86732e-83	7.52158e+73	-9.82776	91.8049	-189.762	170.106	0.914749	0.999667
Myalgia	6.93661e-05	6.80865e-84	7.06699e+74	-9.57611	92.8195	-191.499	172.347	0.917829	0.999667
thrombocytopenia_unspecified	8.19484e-05	6.75163e-83	9.94654e+73	-9.40942	91.734	-189.205	170.386	0.918302	0.999667
Haemangioma	7.46339e-05	5.89039e-84	9.45644e+74	-9.50292	92.9307	-191.644	172.638	0.918552	0.999667
Chron	8.49128e-05	5.33276e-84	1.35205e+75	-9.37389	93.0473	-191.743	172.996	0.919754	0.999667
Pulmonary_hypertension	0.000159184	7.15267e-81	3.54267e+72	-8.74545	89.6937	-184.542	167.051	0.922327	0.999667
vasculitis	0.000168399	3.62105e-81	7.83148e+72	-8.68918	90.0697	-185.223	167.844	0.923146	0.999667
Muscle_weakness	0.000176382	3.65624e-83	8.50891e+74	-8.64286	92.4381	-189.818	172.532	0.925507	0.999667
Other_obstetric_bleeding	7.77278e-05	1.37757e-106	4.38569e+97	-9.4623	119.539	-243.754	224.829	0.936908	0.999667
Other_gynaecological_bleeding	2.18537e-05	2.26597e-123	2.10764e+113	-10.7311	138.609	-282.4	260.938	0.938289	0.999667
other_connective_tissue	7.40407e-05	2.69938e-130	2.03085e+121	-9.5109	147.366	-298.343	279.321	0.948541	0.999667
Ataxia	7.69414e-05	2.41546e-134	2.45087e+125	-9.47247	152.142	-307.665	288.72	0.950355	0.999667
ankylosing_spondilytis	7.84666e-05	3.18994e-134	1.93013e+125	-9.45284	152.01	-307.386	288.481	0.950415	0.999667
thyrotoxicosis	8.74436e-05	8.99978e-133	8.49619e+123	-9.34452	150.361	-304.047	285.358	0.950446	0.999667
VEL_haemochromatosis	7.95032e-05	1.53378e-134	4.12102e+125	-9.43971	152.39	-308.119	289.239	0.950607	0.999667
Aplastic_anaemia	9.27195e-05	2.09375e-132	4.10599e+123	-9.28593	149.96	-303.202	284.63	0.950624	0.999667
Splenomegaly_new	0.000111179	2.7578e-133	4.48215e+124	-9.10437	151.087	-305.229	287.021	0.951949	0.999667
Splenomegaly	0.000111179	2.7578e-133	4.48215e+124	-9.10437	151.087	-305.229	287.021	0.951949	0.999667
SLE	0.000144369	5.15934e-132	4.03974e+123	-8.84314	149.726	-302.3	284.614	0.952903	0.999667
Myelodysplastic_syndrome	0.000188159	5.10001e-129	6.94192e+120	-8.57822	146.342	-295.404	278.248	0.953257	0.999667
Hepatomegaly	0.000135938	4.31017e-134	4.28731e+125	-8.90331	152.137	-307.085	289.279	0.953333	0.999667
thyroiditis	0.000198785	8.52009e-129	4.63792e+120	-8.52329	146.109	-294.891	277.844	0.953482	0.999667
Idiopathic_thrombocytopenic_purpura	0.00014926	2.95277e-134	7.54499e+125	-8.80982	152.377	-307.464	289.844	0.953895	0.999667
Hyposplenism	0.000154458	1.90572e-134	1.25187e+126	-8.77559	152.618	-307.902	290.35	0.954147	0.999667
Hereditary_deficiency_of_other_clotting_factors	0.00020929	1.10285e-134	3.97174e+126	-8.47179	153.052	-308.449	291.505	0.955858	0.999667
CAD_new	1.01652	0.497162	2.07844	0.0163898	0.36492	-0.69884	0.731619	0.964176	0.999667
Acute_myeloid_leukaemia	7.84879e-05	8.79928e-215	7.00096e+205	-9.45257	246.652	-492.881	473.976	0.96943	0.999667
Skin_ulcer	8.00078e-05	1.92568e-216	3.32414e+207	-9.43339	248.612	-496.703	477.836	0.969732	0.999667
autoimmune_hepatatis	0.000105247	5.42081e-213	2.04343e+204	-9.1592	244.699	-488.76	470.442	0.970142	0.999667
blistering_disorder	8.45001e-05	3.77869e-218	1.88961e+209	-9.37876	250.645	-500.634	481.877	0.970151	0.999667
systemic_sclerosis	0.000110819	4.28154e-213	2.8683e+204	-9.10762	244.846	-488.996	470.781	0.970328	0.999667
immunodeficiency	8.48958e-05	5.86464e-220	1.22894e+211	-9.37409	252.773	-504.8	486.052	0.970417	0.999667
Haemarthrosis	9.77516e-05	4.97688e-218	1.91995e+209	-9.23308	250.579	-500.359	481.893	0.970607	0.999667
Cutaneous_bruising_or_bleeding	9.42633e-05	3.01905e-219	2.94316e+210	-9.26942	251.99	-503.161	484.622	0.970657	0.999667
lupus_erythematosus	0.000134088	1.53302e-215	1.17283e+207	-8.91701	247.817	-494.629	476.795	0.971296	0.999667
Pallor	0.000122408	1.55842e-218	9.61463e+209	-9.00815	251.286	-501.52	483.504	0.971403	0.999667
secondary_thrombocytopenia	0.000154297	4.07809e-216	5.83792e+207	-8.77663	248.564	-495.953	478.399	0.971833	0.999667
reactive_arthropaties	0.000137311	7.16141e-220	2.63276e+211	-8.89326	252.916	-504.6	486.813	0.97195	0.999667
vitiligo	0.000203745	4.35666e-219	9.52837e+210	-8.49864	252.196	-502.794	485.797	0.973118	0.999667
von_Willebrand_disease	0.000202965	3.40271e-219	1.21065e+211	-8.50248	252.32	-503.042	486.037	0.973119	0.999667
Dermatopolymyositis	0.000221189	1.46624e-217	3.33674e+209	-8.41649	250.444	-499.278	482.445	0.973191	0.999667
autoimmune_haemolytic_anemia	0.00022678	3.68521e-218	1.39556e+210	-8.39153	251.162	-500.659	483.876	0.973347	0.999667
IHD	1.00989	0.494147	2.06392	0.00984236	0.364682	-0.704922	0.724607	0.978469	0.999667
