# Supplementary material for: Loss of function variant in SMIM1 is associated with reduced energy expenditure and weight gain
Source: Research Square preprint supplement (doi:10.21203/rs.3.rs-1239303/v1), 2022-01-24
Supplement: Supplementary file 10 [file 7b1e6b732c4ebcf70b3df6ff.xlsx]

## Sheet: NHSBT measuements
Genotype	ID	Collection method	GENDER	Smoker	Smoker_past	Alcohol	AGE	BMI	LAR	GLUC	CHOL	TG	HDL	ALT	LEPT	ADPN	AST	Inorganic_Phosphate	Ferritin	hsCRP	FFA	Total_T3	Free_T3	Total_T4	Free_T4	TSH	LDL
SMIM1+/+	S000GZ	NA	Male	No	No	Yes	52	23.9	0.8	4.6	4.9	1.33	1.52	57	5.096	6.39	#N/A	#N/A	#N/A	#N/A	121.522	1.7248	NA	#N/A	NA	2.656	0.41
SMIM1+/+	S0012M	NA	Female	NA	NA	NA	37	#N/A	1.12	3.9	3.9	0.72	1.58	19	10.246	9.16	19	1.15	39	2.58	97.385	1.6324	NA	103.539	NA	2.994	0.32
SMIM1+/+	S001C2	NA	Male	Yes	NA	Yes	67	28.1	0.81	5.9	5	1.29	1.16	42	4.369	5.38	#N/A	#N/A	#N/A	#N/A	201.686	1.53384	NA	#N/A	NA	3.84	0.51
SMIM1+/+	S001KN	NA	Male	NA	NA	NA	42	#N/A	0.65	4.8	7.3	2.06	1.17	38	4.921	7.52	#N/A	#N/A	#N/A	#N/A	54.8	#N/A	NA	123.822	NA	0.4507	0.814
SMIM1+/+	S001NH	NA	Male	No	No	Yes	57	26.7	0.99	5.9	6.3	1.43	1.21	45	8.961	9.04	52	1.15	47	2.91	255.192	1.9404	NA	105.959	NA	4.165	0.732
SMIM1+/+	S001T5	NA	Male	No	No	Yes	52	28.7	1.51	6	4.9	2.22	1.35	37	9.679	6.41	29	0.87	#N/A	2.51	202.792	1.7402	NA	123.295	NA	2.074	0.266
SMIM1+/+	S001YW	NA	Male	No	Yes	Yes	57	25.8	0.33	4.8	6.1	0.78	1.34	35	1.33	4.06	#N/A	1.06	#N/A	#N/A	89.263	1.2782	NA	97.1685	NA	2.211	0.796
SMIM1+/+	S0020M	NA	Male	No	Yes	Yes	62	24	0.74	5	5.5	0.55	1.97	37	4.455	5.99	#N/A	#N/A	#N/A	#N/A	687.924	1.8942	NA	#N/A	NA	1.507	0.596
SMIM1+/+	S0021K	NA	Male	NA	NA	NA	37	22.6	1.21	3.4	2.7	0.98	0.84	28	7.358	6.07	21	1.04	22	0.79	49	1.2936	NA	89.2535	NA	1.202	0.176
SMIM1+/+	S0026A	NA	Female	NA	NA	NA	57	#N/A	2.25	4.9	5.2	1.23	1.47	45	21.516	9.55	31	1.33	34	0.95	266.113	2.3254	NA	170.27	NA	3.048	0.5
SMIM1+/+	S00294	NA	Male	NA	Yes	No	52	25.8	0.67	5	3.8	1.02	1.2	36	3.795	5.69	#N/A	#N/A	#N/A	#N/A	242.964	1.6478	NA	92.1621	NA	2.734	0.316
SMIM1+/+	S002EV	NA	Male	No	No	Yes	47	26.3	0.5	5.8	6.8	1.3	2.04	31	3.595	7.23	#N/A	1.31	#N/A	1.91	256.378	1.6324	NA	101.596	NA	1.26	0.692
SMIM1+/+	S002FT	NA	Male	No	No	Yes	62	24.5	#N/A	#N/A	#N/A	#N/A	#N/A	#N/A	10.5	4.1	#N/A	#N/A	#N/A	#N/A	336.541	1.29514	NA	41.3127	NA	#N/A	#N/A
SMIM1+/+	S002MF	NA	Male	No	Yes	Yes	67	28.4	1.02	5.1	4.8	1.55	1.63	43	6.539	6.44	28	0.95	#N/A	0.49	58.769	1.6632	NA	107.516	NA	2.094	0.324
SMIM1+/+	S002WW	NA	Male	No	No	Yes	47	26	0.11	4	5.2	2	1.8	44	1.502	13.5	#N/A	1.49	#N/A	0.21	168.156	1.3321	NA	74.8648	NA	3.109	0.28
SMIM1+/+	S002XU	NA	Male	No	No	Yes	47	#N/A	0.84	4.9	5.9	2.3	1.33	49	6.353	7.59	30	1.2	#N/A	0.59	115.965	2.1714	NA	130.502	NA	0.9774	0.454
SMIM1+/+	S0031G	NA	Male	NA	NA	NA	67	26.8	0.22	4.3	4.3	0.87	1.62	26	1.442	6.55	#N/A	1.02	#N/A	1.16	160.896	1.31362	NA	88.0565	NA	1.793	0.362
SMIM1+/+	S0032E	NA	Male	No	Yes	Yes	62	28.7	2.4	5.3	5.9	4.18	1.03	41	7.066	2.94	26	1.19	#N/A	1.75	91.35	1.5554	NA	111.21	NA	2.444	0.138
SMIM1+/+	S003JH	NA	Female	No	No	Yes	67	24.2	3.29	6.2	4.9	0.9	2.36	38	27.764	8.45	33	1.37	#N/A	1.71	92.363	2.2176	NA	167.439	NA	2.618	0.328
SMIM1+/+	S003KF	NA	Male	NA	NA	NA	67	#N/A	0.22	4.6	5.5	1.21	1.38	30	1.664	7.45	#N/A	#N/A	#N/A	#N/A	283.816	1.848	NA	#N/A	NA	2.44	0.582
SMIM1+/+	S003MB	NA	Male	No	No	Yes	62	29.1	0.76	4.7	4.9	1.6	1.56	35	7.718	10.2	#N/A	#N/A	#N/A	#N/A	263.16	#N/A	NA	#N/A	NA	1.813	0.348
SMIM1+/+	S003P5	NA	Male	No	No	Yes	47	21	1.13	4.6	6.7	1.66	1.3	51	7.736	6.82	#N/A	#N/A	#N/A	#N/A	197.658	1.9558	NA	#N/A	NA	1.335	0.748
SMIM1+/+	S003Q3	NA	Female	No	No	No	52	33.3	3.01	5.2	5.8	2.35	1.2	43	22.088	7.35	#N/A	#N/A	#N/A	#N/A	244.85	#N/A	NA	#N/A	NA	1.449	0.45
SMIM1+/+	S003R1	NA	Female	No	Yes	Yes	47	26.2	2	4.3	5.9	1.24	2	38	17.738	8.86	#N/A	#N/A	#N/A	#N/A	#N/A	2.1098	NA	#N/A	NA	1.845	0.532
SMIM1+/+	S0041C	NA	Female	No	No	Yes	62	25.2	0.67	4.1	5.7	0.73	1.94	57	6.148	9.13	36	1.35	#N/A	1.37	223.664	1.7094	NA	117.439	NA	2.684	0.606
SMIM1+/+	S00446	NA	Male	No	No	Yes	57	#N/A	1.62	5	4.4	1.47	1.09	57	6.881	4.24	39	1.25	#N/A	1.17	242.136	1.45376	NA	112.085	NA	2.378	0.368
SMIM1+/+	S004M7	NA	Female	No	No	Yes	62	22.2	0.86	6.2	4.5	0.36	2.42	39	14.353	16.6	#N/A	#N/A	#N/A	#N/A	#N/A	#N/A	NA	#N/A	NA	#N/A	0.344
SMIM1+/+	S004N5	NA	Male	No	No	Yes	57	27	0.38	4.9	3.8	2.31	1.69	60	1.576	4.18	#N/A	#N/A	#N/A	#N/A	278.761	1.42758	NA	91.081	NA	1.183	-0.04
SMIM1+/+	S005N1	NA	Male	No	Yes	Yes	57	30.6	0.54	10.7	5.9	1.91	1.66	61	4.81	8.87	44	1.18	102	0.55	290.81	1.31516	NA	68.4298	NA	2.458	0.466
SMIM1+/+	S005WK	NA	Male	No	Yes	Yes	67	28.7	1.6	5.7	7.1	1.97	1.32	40	4.741	2.97	#N/A	#N/A	#N/A	#N/A	447.328	1.5708	NA	#N/A	NA	3.355	0.762
SMIM1+/+	S0064Z	NA	Male	No	No	Yes	52	25.6	0.12	5.3	5.4	0.66	1.6	54	1.133	9.27	29	1.1	46	0.2	220.861	1.4091	NA	82.0205	NA	2.198	0.628
SMIM1+/+	S006UK	NA	Male	Yes	NA	No	52	30.6	2.89	5.1	4.3	1.51	1.05	53	11.5	3.98	#N/A	#N/A	#N/A	#N/A	#N/A	#N/A	NA	#N/A	NA	#N/A	0.348
SMIM1+/+	S006XE	NA	Male	No	No	Yes	67	23.4	6.39	7.2	5.3	5.33	0.79	36	4.93	0.771	#N/A	#N/A	#N/A	#N/A	247.414	#N/A	NA	101.235	NA	1.546	-0.164
SMIM1+/+	S007CF	NA	Female	No	Yes	Yes	62	19.1	0.7	5.5	6.5	1.51	1.7	33	10.3	14.8	#N/A	#N/A	#N/A	#N/A	198.782	#N/A	NA	#N/A	NA	1.496	0.658
SMIM1+/+	S007DD	NA	Female	No	Yes	Yes	52	29.4	3.22	4.9	5.4	1.09	2.01	33	45.7	14.2	21	1.13	46	4.8	105.844	1.617	NA	101.802	NA	1.625	0.46
SMIM1+/+	S007F9	NA	Female	No	Yes	Yes	67	34.9	4.8	5.3	3.9	1.58	1.16	33	93.6	19.5	23	1.18	37	1.41	364.467	1.6786	NA	103.771	NA	2.966	0.232
SMIM1+/+	S007G7	NA	Male	No	No	Yes	62	26.2	0.94	5.4	5	1.64	1.6	39	6.02	6.41	#N/A	#N/A	#N/A	#N/A	416.898	1.5554	NA	102.162	NA	2.537	0.352
SMIM1+/+	S007PQ	NA	Male	No	No	Yes	62	26.1	0.89	4.4	5.5	0.89	1.81	31	12.3	13.8	#N/A	#N/A	#N/A	#N/A	110.41	1.28898	NA	92.8699	NA	1.399	0.56
SMIM1+/+	S007VE	NA	Male	No	No	Yes	32	24.2	0.37	5.8	3.7	1.51	1.34	32	2.28	6.12	18	1.21	41	2.33	90.305	1.694	NA	114.89	NA	1.815	0.17
SMIM1+/+	S007WC	NA	Male	No	Yes	Yes	62	23.6	0.32	5.4	5.5	1.27	1.98	38	3.02	9.53	#N/A	1.19	#N/A	#N/A	#N/A	1.2936	NA	75.7657	NA	2.507	0.45
SMIM1+/+	S00DP2	NA	Female	No	Yes	Yes	67	36.1	15.35	7	7.3	4.11	1.77	31	67.7	4.41	#N/A	#N/A	#N/A	#N/A	#N/A	#N/A	NA	#N/A	NA	#N/A	0.284
SMIM1+/+	S00DQ0	NA	Male	No	No	Yes	52	24.3	1.08	5.9	5.5	2.77	0.99	49	3.99	3.71	#N/A	#N/A	62	#N/A	309.742	1.49688	NA	142.857	NA	2.635	0.348
SMIM1+/+	S00F9Q	NA	Male	No	No	Yes	72	#N/A	0.77	4.4	5.3	0.76	1.47	23	5.77	7.45	#N/A	#N/A	#N/A	#N/A	98.719	1.54	NA	116.19	NA	3.176	0.614
SMIM1+/+	S00FPV	NA	Male	No	No	Yes	67	24.1	0.41	3.5	3.6	0.83	1.16	20	1.79	4.36	#N/A	1.41	#N/A	3.2	78.938	1.43374	NA	96.4092	NA	2.01	0.322
SMIM1+/+	S00FUL	NA	Female	NA	NA	NA	37	#N/A	0.98	4.9	4.3	0.81	1.5	26	19.8	20.3	17	1.3	#N/A	0.45	213.405	2.2792	NA	115.701	NA	1.83	0.398
SMIM1+/+	S00FVJ	NA	Male	No	Yes	Yes	47	23.1	0.32	4.3	5.3	0.89	1.52	31	1.42	4.46	22	0.76	30	0.81	105.117	1.5323	NA	103.063	NA	1.41	0.578
SMIM1+/+	S00G7Q	NA	Female	NA	NA	NA	57	#N/A	0.74	5.4	7.2	1.42	2.07	44	9.34	12.6	31	1.16	50	0.53	95.377	1.53538	NA	102.831	NA	1.611	0.742
SMIM1+/+	S00G9M	NA	Female	NA	NA	NA	42	#N/A	1.22	5.1	5.3	0.69	2.37	23	18.6	15.2	14	0.56	10	2.56	49	1.5708	NA	109.472	NA	1.214	0.448
SMIM1+/+	S00GBI	NA	Male	NA	NA	NA	42	#N/A	0.51	5.4	4.5	1.27	1.33	35	1.03	2.01	23	0.87	30	0.21	49	1.38908	NA	93.7451	NA	1.228	0.38
SMIM1+/+	S00GEC	NA	Male	No	No	Yes	62	#N/A	1.27	5.5	5.3	1.08	1.38	31	8.36	6.57	19	1.22	37	0.37	100.394	1.6478	NA	101.969	NA	2.267	0.568
SMIM1+/+	S00GSL	NA	Female	NA	NA	NA	32	#N/A	1.79	7	6.5	1.73	1.58	33	13.2	7.38	20	1.06	18	6.53	136.476	2.0944	NA	151.995	NA	2.4	0.638
SMIM1+/+	S00GWD	NA	Female	NA	NA	NA	37	#N/A	1.45	3.7	4.3	0.5	1.55	35	16.7	11.5	#N/A	#N/A	#N/A	#N/A	49	1.5708	NA	92.4581	NA	1.454	0.45
SMIM1+/+	S00H5Q	NA	Female	No	No	No	62	25.3	2.08	6.5	5.8	1.37	2.39	27	23.1	11.1	24	0.95	11	2.33	78.232	1.6016	NA	122.445	NA	1.583	0.408
SMIM1+/+	S00HVB	NA	Male	NA	NA	NA	67	#N/A	#N/A	5.6	5.8	1.22	1.13	42	3.4	10.6	24	0.87	#N/A	3.07	250.236	1.9712	NA	191.248	NA	0.6158	0.69
SMIM1+/+	S00J3M	NA	Male	NA	NA	NA	47	#N/A	0.89	3.9	6.3	2.48	2.07	32	7.1	8.02	#N/A	#N/A	#N/A	#N/A	99	1.9866	NA	#N/A	NA	1.342	0.35
SMIM1+/+	S00J5I	NA	Female	No	No	Yes	47	#N/A	#N/A	4.6	6.3	1.27	1.24	27	#N/A	#N/A	#N/A	1.2	#N/A	0.71	121.224	1.7094	NA	162.419	NA	1.88	0.758
SMIM1+/+	S00J9A	NA	Female	NA	NA	NA	27	#N/A	0.51	5.2	5	1.46	1.87	28	7.62	15	21	1.12	8	0.25	230.759	1.42296	NA	94.5816	NA	1.118	0.334
SMIM1+/+	S00JA8	NA	Female	NA	NA	NA	22	#N/A	1.23	5.1	#N/A	1.19	1.71	#N/A	10.5	8.5	24	1.15	18	0.9	105.404	#N/A	NA	#N/A	NA	#N/A	#N/A
SMIM1+/+	S00JD2	NA	Female	No	No	Yes	47	61.3	5.93	4.6	4.1	1.32	1.48	25	44.3	7.54	#N/A	1.29	#N/A	0.47	140.162	1.7556	NA	102.896	NA	5.632	0.26
SMIM1+/+	S00JT7	NA	Male	No	Yes	Yes	72	29.8	0.12	4.7	4.6	0.96	1.47	37	2.35	20.1	28	1.08	16	1.61	541.385	1.34904	NA	97.4388	NA	1.765	0.434
SMIM1+/+	S00JU5	NA	Male	NA	NA	NA	52	#N/A	0.99	6.4	6.1	1.6	1.36	36	8.01	8.12	23	1.2	33	1.21	149.594	1.27666	NA	95.9458	NA	3.128	0.628
SMIM1+/+	S00JV3	NA	Male	NA	NA	NA	22	#N/A	0.05	5.3	4.1	0.74	1.42	28	0.33	7.02	34	0.98	26	0.35	90.305	1.5554	NA	118.353	NA	5.308	0.388
SMIM1+/+	S00JYY	NA	Female	No	Yes	Yes	67	25	0.74	5.3	6.4	1.21	1.7	31	14.3	19.2	#N/A	#N/A	#N/A	#N/A	#N/A	#N/A	NA	#N/A	NA	#N/A	0.698
SMIM1+/+	S00K0O	NA	Male	No	No	Yes	47	33.7	0.77	5.3	4.5	2.12	1.1	47	7.81	10.2	#N/A	#N/A	#N/A	#N/A	64.76	#N/A	NA	#N/A	NA	1.295	0.256
SMIM1+/+	S00K4G	NA	Male	No	No	Yes	42	27.1	0.94	4.5	5.4	2.05	1.19	40	7	7.45	27	0.64	39	0.34	50.849	1.4784	NA	91.969	NA	16.2	0.432
SMIM1+/+	S00KEX	NA	Male	No	No	Yes	57	22.2	0.35	5.1	6	2.07	1.56	32	2.24	6.46	17	0.84	16	0.19	62.758	1.14268	NA	75.1479	NA	2.05	0.474
SMIM1+/+	S00KFV	NA	Male	No	No	Yes	62	23.7	0.92	4.7	4.6	1.24	1.15	35	5.36	5.8	#N/A	#N/A	#N/A	#N/A	210.234	1.7094	NA	#N/A	NA	1.066	0.442
SMIM1+/+	S00KHR	NA	Female	No	No	Yes	67	25.6	2.54	9.5	7.7	0.97	2.8	129	46	18.1	98	1.65	#N/A	3.37	95.153	2.079	NA	169.369	NA	1.904	0.786
SMIM1+/+	S00KKL	NA	Female	No	No	Yes	72	24.2	0.76	5.3	4.3	0.94	1.91	26	16.8	22	#N/A	1.26	#N/A	1.13	231.556	1.4399	NA	113.526	NA	1.543	0.29
SMIM1+/+	S00M0G	NA	Male	No	Yes	Yes	67	30.8	2.31	6	3.5	2.76	0.88	36	11.5	4.98	#N/A	#N/A	#N/A	#N/A	174.66	#N/A	NA	#N/A	NA	1.689	-0.028
SMIM1+/+	S00M2C	NA	Male	No	Yes	No	57	24.3	0.04	5.9	4.3	0.98	1.52	25	0.74	19.4	18	1.02	22	0.41	175.718	1.35674	NA	102.896	NA	1.571	0.36
SMIM1+/+	S00M48	NA	Female	No	No	Yes	72	21.1	0.65	5.3	7.7	1.17	2.64	25	9.73	15	26	1.16	12	0.45	153.649	1.47532	NA	92.0076	NA	2.238	0.778
SMIM1+/+	S00M80	NA	Male	No	Yes	Yes	72	29.4	1.23	4.7	4	0.68	1.45	31	8.23	6.67	23	0.9	28	0.45	97.385	1.53692	NA	101.39	NA	2.234	0.374
SMIM1+/+	S00MBV	NA	Male	No	No	Yes	52	25.4	0.84	5.6	6	0.98	2.24	31	6.35	7.53	#N/A	1.29	#N/A	0.36	343.962	1.6632	NA	84.6202	NA	3.212	0.556
SMIM1+/+	S00N36	NA	Female	No	No	Yes	55	22.8	#N/A	5.6	5.4	1.39	1.72	18	#N/A	#N/A	#N/A	#N/A	#N/A	#N/A	232.513	2.0482	NA	108.571	NA	1.562	0.458
SMIM1+/+	S00N52	NA	Female	NA	NA	NA	57	#N/A	0.29	3.5	5.8	0.77	2.28	30	5.87	20.2	18	1.02	29	#N/A	49	1.39216	NA	89.2406	NA	6.756	0.55
SMIM1+/+	S00N7Z	NA	Female	No	No	Yes	62	20.9	0.18	5.2	5.7	1.02	2.18	23	4.62	26.3	#N/A	#N/A	#N/A	#N/A	501.642	1.28436	NA	55.8043	NA	10.97	0.5
SMIM1+/+	S00NBR	NA	Male	No	Yes	Yes	72	25.8	0.41	6.8	5.5	1.82	1.15	39	3.64	8.93	#N/A	1.14	#N/A	#N/A	#N/A	1.7248	NA	111.287	NA	5.369	0.506
SMIM1+/+	S00NHF	NA	Female	NA	NA	NA	32	#N/A	0.98	5.1	5.1	2.07	1.22	25	17.3	17.7	28	0.96	#N/A	3.88	212.265	1.7556	NA	127.374	NA	1.342	0.362
SMIM1+/+	S00NQY	NA	Male	No	No	Yes	57	25.2	0.97	4.1	2.5	0.27	1.68	30	3.288	3.39	#N/A	0.79	#N/A	#N/A	49	1.31362	NA	123.217	NA	1.775	0.11
SMIM1+/+	S00NRW	NA	Male	No	No	Yes	62	28.7	1.37	6.5	5.2	1.33	1.97	36	8.91	6.52	24	0.62	12	4.39	189.659	1.44144	NA	118.867	NA	1.727	0.38
SMIM1+/+	S00NUQ	NA	Female	No	Yes	Yes	60	25.6	1.68	5	5.5	2.43	1.92	27	15.5	9.2	#N/A	1.31	#N/A	0.36	138.134	1.36136	NA	129.73	NA	0.8119	0.23
SMIM1+/+	S00NVO	NA	Male	Yes	NA	Yes	65	#N/A	0.95	5.1	3.6	1.91	0.88	40	3.98	11.7	18	0.99	21	1.55	99	1.27358	NA	67.2844	NA	1.285	0.162
SMIM1+/+	S00NWM	NA	Female	Yes	NA	Yes	72	27.2	#N/A	5.8	6.8	0.94	2.05	30	#N/A	#N/A	#N/A	1.13	#N/A	1.79	774.314	1.925	NA	#N/A	NA	3.645	0.762
SMIM1+/+	S00NXK	NA	Female	No	No	Yes	62	27.9	1.15	5.3	6.6	0.91	2.48	56	22.4	19.5	23	1.37	94	0.2	301.181	2.002	NA	116.731	NA	1.116	0.642
SMIM1+/+	S00P04	NA	Female	No	Yes	Yes	32	29.8	10.5	6	3.8	2.84	0.93	28	60.8	5.79	13	0.94	8	1.85	140.162	1.848	NA	130.888	NA	1.616	0.006
SMIM1+/+	S00P20	NA	Female	No	No	Yes	62	26.6	3.23	6.5	5.9	2.53	1.39	65	28.3	8.76	35	1.02	22	1.98	222.416	1.9558	NA	120.296	NA	2.025	0.396
SMIM1+/+	S00P4X	NA	Female	No	No	Yes	67	24.8	3.31	7	3.5	1.26	1.23	36	29	8.77	28	0.8	130	1.68	63.938	1.694	NA	131.66	NA	3.569	0.202
SMIM1+/+	S00P6T	NA	Female	No	No	Yes	62	41	4.01	6.5	3.1	2.36	0.69	18	17.3	4.31	20	1.06	#N/A	4.16	79.246	1.43528	NA	105.019	NA	2.294	0.01
SMIM1+/+	S00P8P	NA	Female	No	Yes	No	67	24.5	1.26	5.6	6	2.68	1.68	33	12.9	10.2	#N/A	#N/A	#N/A	#N/A	106.405	1.9096	NA	100.36	NA	0.4118	0.328
SMIM1+/+	S00PBJ	NA	Female	No	No	Yes	42	27.5	5.97	4.9	6.2	2.01	1.35	31	40	6.7	19	0.82	23	2.56	81.211	1.7864	NA	142.085	NA	3.23	0.568
SMIM1+/+	S00PCH	NA	Male	NA	NA	NA	62	#N/A	0.45	5.7	5.3	1.97	1.59	39	4.15	9.32	#N/A	#N/A	#N/A	#N/A	238.534	#N/A	NA	#N/A	NA	1.355	0.348
SMIM1+/+	S00PDF	NA	Female	No	No	Yes	32	22.2	0.89	3.1	3.5	0.52	0.9	27	6.16	6.93	23	0.75	20	1.23	77.915	1.7248	NA	99.6009	NA	2.742	0.416
SMIM1+/+	S00PED	NA	Female	No	No	Yes	62	26.6	1.17	5	5.5	0.9	1.55	30	16.8	14.3	26	1.22	5	1.1	271.047	1.44144	NA	109.961	NA	1.427	0.61
SMIM1+/+	S00PK1	NA	Male	No	No	Yes	57	29.6	1.93	4.6	3	4.14	0.81	42	11.6	6.02	#N/A	#N/A	#N/A	#N/A	#N/A	1.33518	NA	90.0256	NA	4.147	-0.39
SMIM1+/+	S00PQQ	NA	Female	No	No	Yes	52	30.5	3.54	4.9	4.7	1.13	1.65	27	26.1	7.38	34	1.37	35	1.12	205.64	2.8182	NA	138.224	NA	7.13	0.384
SMIM1+/+	S00PVG	NA	Female	NA	NA	NA	62	#N/A	0.6	5.7	5.3	1.75	1.53	37	4	6.71	22	0.87	105	0.3	78.938	1.33056	NA	103.089	NA	1.022	0.404
SMIM1+/+	S00PYA	NA	Female	No	Yes	Yes	67	23.7	0.21	4.1	6	0.94	1.89	25	4.13	19.4	17	0.92	37	0.39	53.811	1.16116	NA	67.5418	NA	2.443	0.634
SMIM1+/+	S00Q00	NA	Female	No	No	Yes	77	29.7	3.79	4.6	5.5	1.37	1.53	27	29.7	7.83	20	1.14	43	1.84	481.038	1.51844	NA	131.789	NA	1.051	0.52
SMIM1+/+	S00Q4T	NA	Female	No	No	Yes	52	20.2	0.44	5.3	6.8	1.97	2.69	31	5.97	13.7	43	1.6	28	0.59	94.496	1.52306	NA	135.392	NA	2.387	0.428
SMIM1+/+	S00Q5R	NA	Male	No	Yes	Yes	72	23.1	1.17	6.4	3	3.13	1.21	29	9.33	7.98	24	1.02	#N/A	3.82	100.88	1.49996	NA	108.623	NA	1.427	-0.268
SMIM1+/+	S00Q6P	NA	Female	No	No	Yes	67	23.5	1	4.8	5.7	1.04	1.6	31	17	17	23	1.26	59	0.31	230.402	1.44298	NA	82.072	NA	1.694	0.612
SMIM1+/+	S00QE9	NA	Female	No	Yes	Yes	37	22.9	1.51	4	3.7	0.79	1.25	22	14.7	9.72	18	1.11	95	1.15	190.704	1.10726	NA	88.4941	NA	1.933	0.332
SMIM1+/+	S00QPO	NA	Female	No	No	Yes	62	20.7	0.63	5.1	6	0.81	2.89	29	11.2	17.7	#N/A	#N/A	#N/A	#N/A	576.894	#N/A	NA	#N/A	NA	1.597	0.46
SMIM1+/+	S00QQM	NA	Female	No	No	Yes	67	20.5	0.11	5	5.9	0.87	2.59	31	1.46	12.7	25	1.38	17	0.27	102.976	1.26742	NA	74.5302	NA	3.935	0.488
SMIM1+/+	S00QRK	NA	Female	No	No	Yes	62	30.1	2.02	4.9	6.2	2.81	1.37	26	18.7	9.24	22	1.32	23	4.16	107.407	1.24894	NA	94.5816	NA	2.01	0.404
SMIM1+/+	S00QTG	NA	Female	No	Yes	Yes	47	26.9	2.19	4.6	4.4	1.96	1.64	25	23.4	10.7	23	1.16	31	1.07	192.798	1.5554	NA	136.808	NA	0.79	0.16
SMIM1+/+	S00QUE	NA	Female	No	No	No	62	24.8	0.68	4.8	3.6	2.08	1.02	17	7.6	11.1	17	1.07	39	0.41	109.428	1.23508	NA	91.6215	NA	1.137	0.1
SMIM1+/+	S00QWA	NA	Female	No	No	Yes	67	20.4	0.42	3.5	4.6	0.75	1.6	23	4.66	11.1	21	1.12	37	0.56	70.8	1.6324	NA	122.085	NA	1.783	0.45
SMIM1+/+	S00QY6	NA	Female	No	No	Yes	47	21.9	1.49	5	4.7	1.31	1.63	23	14.6	9.8	#N/A	1.04	#N/A	2.14	#N/A	1.23508	NA	85.9587	NA	1.087	0.352
SMIM1+/+	S00R0X	NA	Female	No	No	Yes	62	24.2	3.57	6.6	4.7	1.68	1.78	34	24.4	6.84	25	1.14	15	4.37	117.417	1.8172	NA	122.471	NA	1.944	0.248
SMIM1+/+	S00R1V	NA	Female	No	Yes	Yes	57	30	2.21	5.8	5.9	1.17	1.37	34	22.3	10.1	24	1.11	30	1.94	61.877	1.5862	NA	116.911	NA	1.342	0.672
SMIM1+/+	S00R9F	NA	Female	No	Yes	Yes	62	24.7	2.03	5.7	6.6	1.58	2.1	56	30.5	15	50	1.15	45	1.58	185.487	1.8172	NA	162.419	NA	4.403	0.584
SMIM1+/+	S00RAD	NA	Male	No	Yes	Yes	62	#N/A	1.82	8.4	5.1	2.47	1.2	36	13	7.14	31	0.93	#N/A	3.57	78.232	1.29822	NA	72.6125	NA	1.957	0.286
SMIM1+/+	S00RBB	NA	Male	No	No	Yes	62	20.9	0.07	5.9	5.1	1.03	2.53	34	1.45	22	#N/A	1.12	#N/A	0.24	#N/A	1.617	NA	125.328	NA	1.908	0.308
SMIM1+/+	S00RC9	NA	Female	No	No	Yes	32	24.2	1.73	5.3	4.5	1.12	1.48	17	13.5	7.82	#N/A	1.14	#N/A	1.78	#N/A	1.386	NA	96.2547	NA	2.507	0.38
SMIM1+/+	S00RD7	NA	Male	No	No	Yes	57	30.8	1.83	5.4	5.4	2.67	1.6	36	8.21	4.49	#N/A	#N/A	#N/A	#N/A	305.268	#N/A	NA	#N/A	NA	3.401	0.226
SMIM1+/+	S00RMQ	NA	Male	No	Yes	No	67	24.4	0.39	5.1	5.7	1.93	1.51	34	3.3	8.49	#N/A	1.24	#N/A	#N/A	193.206	2.233	NA	159.331	NA	3.174	0.452
SMIM1+/+	S00S2P	NA	Female	No	No	Yes	62	33.6	3.68	4.9	2.9	0.95	1.29	65	18.2	4.94	25	1.27	#N/A	0.19	49	1.5246	NA	117.838	NA	2.382	0.132
SMIM1+/+	S00S4L	NA	Female	No	No	Yes	47	26.4	1.09	8.2	5.5	0.96	1.5	25	8.19	7.54	19	1.14	49	1.56	99.391	1.50458	NA	115.843	NA	1.658	0.608
SMIM1+/+	S00S6H	NA	Female	No	Yes	Yes	72	24.2	1.31	6.5	5.5	0.83	2.32	30	19.9	15.2	25	1.71	#N/A	0.9	196.776	1.42296	NA	105.302	NA	2.696	0.47
SMIM1+/+	S00S7F	NA	Female	No	No	Yes	62	31.6	0.44	5.2	5.8	0.94	2.26	21	22.4	50.6	26	1.09	20	2.48	361.435	1.49226	NA	97.8892	NA	3.079	0.52
SMIM1+/+	S00SE1	NA	Female	No	No	Yes	62	21.7	0.79	4.7	5	1.98	1.72	29	12.6	16	#N/A	#N/A	#N/A	#N/A	#N/A	#N/A	NA	#N/A	NA	2.103	0.26
SMIM1+/+	S00SHW	NA	Female	No	Yes	Yes	62	25.7	1.84	6	7.2	1.93	1.5	37	17.6	9.56	76	1.33	#N/A	1.28	232.713	1.7402	NA	122.69	NA	1.21	0.754
SMIM1+/+	S00SJS	NA	Male	No	Yes	Yes	57	24.3	0.54	4.7	4.5	1.69	0.97	31	4.21	7.73	#N/A	#N/A	#N/A	#N/A	119.528	1.18118	NA	#N/A	NA	2.193	0.368
SMIM1+/+	S00SMM	NA	Male	No	Yes	Yes	72	24.1	0.02	6.6	6.9	0.45	3.39	25	0.55	23.6	#N/A	1.29	#N/A	#N/A	#N/A	1.14114	NA	74.0797	NA	2.552	0.612
SMIM1+/+	S00SPG	NA	Female	No	Yes	No	52	42.2	3.02	6.6	4.4	1.69	1.47	38	53.7	17.8	34	0.99	#N/A	8.47	61.706	1.6478	NA	165.38	NA	1.934	0.248
SMIM1+/+	S00SV4	NA	Female	No	Yes	Yes	57	29.3	1.66	6.1	8.2	0.85	2.19	#N/A	20.7	12.5	#N/A	#N/A	#N/A	#N/A	68.043	1.8018	NA	141.184	NA	1.184	1.032
SMIM1+/+	S00SX0	NA	Male	No	Yes	Yes	67	27.1	0.81	5.2	4.8	2.13	1.29	24	8.3	10.3	23	0.92	38	0.98	223.508	1.24278	NA	84.9549	NA	5.321	0.276
SMIM1+/+	S00SYZ	NA	Female	No	No	Yes	72	30.5	3.77	5.3	5	1.06	1.79	24	56.9	15.1	21	1.15	21	8.97	291.111	1.44144	NA	162.291	NA	1.577	0.43
SMIM1+/+	S00T4H	NA	Female	No	Yes	Yes	67	25.5	1.19	5.2	6.6	0.85	2.32	28	20.2	17	16	1.08	31	1.67	77.217	1.48302	NA	81.4156	NA	2.568	0.686
SMIM1+/+	S00T5F	NA	Female	No	Yes	Yes	72	27.2	2.61	5.2	4.9	2.13	1	33	17.8	6.82	16	1.14	23	4.08	67.019	1.36136	NA	113.269	NA	2.617	0.354
SMIM1+/+	S00T6D	NA	Male	No	No	Yes	62	21	0.31	3.5	4.8	1.34	1.48	30	1.43	4.67	17	1.04	42	0.68	72.825	1.1473	NA	101.66	NA	1.239	0.396
SMIM1+/+	S00TA5	NA	Female	No	Yes	Yes	67	23.5	0.56	4.2	3.5	1.16	1.19	13	6.35	11.3	17	1.3	#N/A	0.45	173.211	1.2782	NA	78.0179	NA	1.559	0.23
SMIM1+/+	S00TT4	NA	Male	No	Yes	Yes	72	26.1	0.63	4	2.6	1.26	0.97	24	5.14	8.1	26	0.92	28	2.45	338.077	1.54	NA	117.902	NA	3.575	0.074
SMIM1+/+	S00U1J	NA	Male	No	Yes	Yes	62	27.3	1.23	5.9	3.3	3.11	1.04	43	7.42	6.01	27	1.15	24	2.92	309.854	1.52614	NA	102.188	NA	1.624	-0.17
SMIM1+/+	S00U5B	NA	Male	No	Yes	Yes	57	29	2.96	6.1	3.6	3.83	0.85	49	11.2	3.78	#N/A	#N/A	#N/A	#N/A	206.8	#N/A	NA	#N/A	NA	2.042	-0.216
SMIM1+/+	S00U77	NA	Male	No	Yes	Yes	62	32.5	7.74	5.4	6.6	1.7	1.04	39	27.1	3.5	27	1.17	19	1.18	115.415	1.848	NA	120.129	NA	2.404	0.772
SMIM1+/+	S00U93	NA	Female	No	Yes	Yes	47	20.9	0.38	6	4.4	1.02	2.37	23	4.88	12.7	#N/A	#N/A	#N/A	#N/A	176.977	1.30284	NA	95.7528	NA	1.59	0.202
SMIM1+/+	S00UKI	NA	Male	NA	Yes	Yes	57	#N/A	3.76	5.7	5.5	2.92	1.09	#N/A	11.7	3.11	#N/A	#N/A	#N/A	#N/A	146.3	#N/A	NA	#N/A	NA	2.274	0.298
SMIM1+/+	S00V57	NA	Female	No	No	Yes	67	27.8	3.83	7.3	5.2	2.22	1.43	42	22.7	5.93	39	0.85	44	4.89	52.534	1.8942	NA	131.789	NA	1.704	0.31
SMIM1+/+	S00V65	NA	Female	No	No	Yes	67	31.6	5.17	5.2	6.7	1.33	2.08	39	65.1	12.6	27	1	16	2.73	68.244	1.8634	NA	169.884	NA	0.3861	0.658
SMIM1+/+	S00VGM	NA	Female	No	Yes	Yes	67	30.4	3.94	5.9	5.3	1.49	1.42	28	33.5	8.5	20	1.17	13	6.94	87.655	1.6786	NA	117.284	NA	4.46	0.478
SMIM1+/+	S00VVT	NA	Female	No	No	Yes	67	24.7	0.65	6	6.4	1.57	2.28	28	18.4	28.3	22	1.19	#N/A	0.99	151.62	1.42142	NA	109.266	NA	2.863	0.51
SMIM1+/+	S00W29	NA	Female	No	Yes	Yes	52	#N/A	1.02	5.4	5.7	1.2	2.35	43	10.5	10.3	#N/A	#N/A	#N/A	#N/A	301.214	#N/A	NA	#N/A	NA	3.126	0.43
SMIM1+/+	S00W45	NA	Female	No	No	Yes	67	25.2	1.45	5.8	5.2	0.93	2.24	36	19.8	13.7	27	1.42	37	1.68	358.745	1.22738	NA	106.113	NA	2.046	0.406
SMIM1+/+	S00WKA	NA	Female	No	No	Yes	67	23.3	0.81	4.4	5.6	0.9	2.27	54	9.94	12.3	31	1.26	41	0.78	225.819	1.31054	NA	100.27	NA	1.19	0.486
SMIM1+/+	S00WQZ	NA	Female	No	No	Yes	62	30.9	4.53	5.8	5	1.53	1.35	23	43.4	9.59	16	1.29	31	7.29	380.034	1.8634	NA	166.28	NA	1.245	0.424
SMIM1+/+	S00WTT	NA	Female	No	No	Yes	57	25.2	1.89	5	4.7	0.73	2.14	32	16.1	8.52	18	1.05	104	0.95	256.377	1.38446	NA	77.5546	NA	1.603	0.366
SMIM1+/+	S00XGE	NA	Male	No	No	Yes	62	24.2	0.42	5.1	6.2	1.07	1.36	29	3.41	8.05	18	1.06	36	4.55	49	1.45838	NA	84.9677	NA	1.591	0.754
SMIM1+/+	S00XHC	NA	Male	NA	NA	NA	57	24.4	0.55	5.2	5	3.4	1.09	49	4.35	7.94	29	1.04	70	2.42	167.008	1.7556	NA	119.228	NA	1.504	0.102
SMIM1+/+	S00XK6	NA	Female	No	No	Yes	67	21.1	1.37	4.9	6	1.15	1.7	22	13.1	9.55	21	1.27	22	0.85	211.166	1.5554	NA	99.5623	NA	1.383	0.63
SMIM1+/+	S00XRT	NA	Female	No	No	Yes	77	22.9	#N/A	5.1	5.8	1.85	1.28	33	#N/A	#N/A	#N/A	#N/A	#N/A	#N/A	138.658	1.6786	NA	#N/A	NA	2.065	0.534
SMIM1+/+	S00YCI	NA	Male	Yes	NA	No	67	26.8	0.72	5.7	4.3	3.25	0.62	32	3.73	5.17	#N/A	#N/A	#N/A	#N/A	#N/A	#N/A	NA	#N/A	NA	#N/A	0.086
SMIM1+/+	S00YEE	NA	Male	No	No	Yes	47	30.6	2.38	5.5	5.8	3.58	0.95	33	12.8	5.38	#N/A	#N/A	#N/A	#N/A	248.858	1.6478	NA	#N/A	NA	1.002	0.254
SMIM1+/+	S00YH8	NA	Female	No	Yes	Yes	62	25.9	3.67	5.7	7.3	4.31	1.63	42	17.2	4.69	26	1.1	#N/A	2.34	201.333	1.5862	NA	113.282	NA	0.9844	0.272
SMIM1+/+	S00YK2	NA	Male	Yes	NA	Yes	57	25.9	0.32	5.4	5.9	1.4	1.46	39	3.38	10.5	25	1.18	28	3.35	76.893	1.8942	NA	117.362	NA	1.484	0.608
SMIM1+/+	S00YRP	NA	Female	No	Yes	No	77	18.7	0.14	6.2	6.1	1.12	2.23	36	3.5	25.7	#N/A	#N/A	#N/A	#N/A	#N/A	#N/A	NA	#N/A	NA	#N/A	0.55
SMIM1+/+	S00YVH	NA	Male	No	Yes	Yes	52	29.7	0.92	4.2	5.8	2.39	1.36	30	7.86	8.56	21	1.04	142	0.61	90.351	1.6016	NA	106.86	NA	1.917	0.41
SMIM1+/+	S0100M	NA	Female	No	No	Yes	67	27.2	3.17	4.7	5.7	1.99	1.36	34	27.4	8.63	23	1.32	64	1.65	272.279	2.4486	NA	160.489	NA	1.702	0.47
SMIM1+/+	S010B0	NA	Male	No	No	Yes	67	24.7	0.63	26.3	6	2.36	1.26	49	2.74	4.32	15	0.99	87	4.95	501.642	1.31824	NA	111.737	NA	5.981	0.476
SMIM1+/+	S010MF	NA	Female	No	No	Yes	65	32.4	6.56	5.5	4.8	2.48	1.13	34	53.9	8.22	22	1.09	21	6.67	62.799	1.5554	NA	115.238	NA	1.912	0.238
SMIM1+/+	S010P9	NA	Female	NA	NA	NA	35	#N/A	9.71	5.2	4.2	0.53	1.17	21	54.5	5.61	16	0.99	42	1.76	107.982	1.46916	NA	145.688	NA	2.304	0.5
SMIM1+/+	S010VY	NA	Female	No	No	Yes	50	29.1	1.03	4.8	6.2	0.89	2.26	27	12.4	12	#N/A	#N/A	#N/A	#N/A	150.37	1.7094	NA	#N/A	NA	1.889	0.61
SMIM1+/+	S011AZ	NA	Female	No	No	NA	62	#N/A	2.64	3.4	5.6	1.48	1.88	27	20.8	7.87	10	1.1	18	0.3	49	1.26896	NA	113.771	NA	2.489	0.448
SMIM1+/+	S011DT	NA	Male	NA	NA	NA	25	#N/A	2.64	5.3	5.8	1.66	1.26	46	12	4.55	26	1	21	1.85	104.402	1.8172	NA	122.072	NA	1.893	0.576
SMIM1+/+	S011ER	NA	Female	No	No	Yes	55	22.8	0.96	4.7	7.1	0.54	2.62	32	8.83	9.17	24	1.22	63	1.19	49	1.45068	NA	100.051	NA	1.904	0.788
SMIM1+/+	S011HL	NA	Female	NA	NA	NA	65	20.2	0.25	5.5	6	1.26	2.26	18	4.87	19.7	#N/A	1.44	#N/A	#N/A	377.683	1.19966	NA	96.6666	NA	2.684	0.496
SMIM1+/+	S011JH	NA	Female	No	No	Yes	57	33.6	5.23	4.5	4.8	2.19	1.14	26	30.8	5.89	21	1.06	49	5.69	159.751	1.9558	NA	194.723	NA	0.5672	0.294
SMIM1+/+	S011UW	NA	Male	NA	NA	NA	55	#N/A	0.43	5.2	6.7	3.81	1.14	42	2.85	6.56	#N/A	1.16	#N/A	#N/A	458.66	1.5862	NA	117.799	NA	2.472	0.35
SMIM1+/+	S01238	NA	Female	No	No	Yes	52	23.3	0.53	4.2	3.5	0.71	1.74	33	4.03	7.61	38	1.04	#N/A	2.38	584.068	1.17348	NA	88.8545	NA	3.085	0.21
SMIM1+/+	S01246	NA	Female	NA	NA	NA	32	#N/A	1.3	3.1	2.4	0.4	1.04	25	13.3	10.2	#N/A	#N/A	#N/A	#N/A	87.33	1.53076	NA	135.392	NA	0.91	0.192
SMIM1+/+	S0130A	NA	Male	No	No	Yes	47	23.5	0.14	3.4	4.8	1.21	1.68	41	0.8	5.73	#N/A	0.95	#N/A	#N/A	49	1.25818	NA	76.924	NA	1.43	0.382
SMIM1+/+	S01342	NA	Female	NA	NA	NA	42	#N/A	1.8	5.2	5	1.33	1.74	24	19.6	10.9	15	1.48	#N/A	2.71	#N/A	1.6632	NA	95.9587	NA	1.021	0.386
SMIM1+/+	S0137X	NA	Female	No	Yes	Yes	47	18.9	0.08	5	4.9	0.56	3.02	33	2.61	33.8	20	1.23	17	0.28	433.799	1.12882	NA	74.7104	NA	3.138	0.264
SMIM1+/+	S013CN	NA	Female	No	No	Yes	57	24.4	1.12	5.2	6.2	0.86	2.36	34	12.5	11.2	#N/A	#N/A	#N/A	#N/A	383.502	#N/A	NA	#N/A	NA	1.332	0.596
SMIM1+/+	S013DL	NA	Female	NA	NA	NA	50	#N/A	7.96	5.5	4.3	1.09	1.3	25	30.1	3.78	22	1.22	19	1.39	198.061	2.0174	NA	122.638	NA	5.248	0.382
SMIM1+/+	S013HD	NA	Female	No	No	Yes	65	28.5	3.37	5.3	5.1	1.26	1.65	24	31	9.21	20	1.16	22	2.14	144.486	1.53384	NA	111.377	NA	4.352	0.438
SMIM1+/+	S013J9	NA	Female	No	Yes	Yes	60	19.8	0.14	4.7	3.9	0.78	1.7	25	3.45	25	#N/A	#N/A	#N/A	#N/A	395.136	1.15346	NA	99.5623	NA	1.851	0.284
SMIM1+/+	S013K7	NA	Male	No	Yes	Yes	67	19.8	0.94	6.2	4.7	2.46	1.36	37	4.62	4.91	#N/A	#N/A	#N/A	#N/A	159.924	1.53076	NA	110.27	NA	1.831	0.176
SMIM1-/-	S0180R	Home visit	Male	NA	NA	NA	29	23.8	0.226891	4.1	3.8	0.5	2.12	45	2.7	11.9	62	1.2	24	0.19	307.358	1.44	NA	89	NA	1.698	0.236
SMIM1-/-	S01979	Home visit	Male	NA	NA	NA	67	26.4	2.66	5.3	5.2	2	2.25	43	13.3	5	45	0.87	91	2.87	823.367	1.25	NA	68	NA	2.664	0.19
SMIM1-/-	S01A0J	Home visit	Female	NA	NA	NA	77	24.2	2.47297	4	6	0.7	2.03	29	18.3	7.4	27	1.32	44	1.5	581.863	1.33	NA	87	NA	1.911	0.654
SMIM1-/-	S01AGO	Home visit	Male	NA	NA	NA	56	26.7	2.08889	4.6	5.4	1.4	1.22	44	9.4	4.5	34	0.97	59	2.5	840.043	1.48	NA	119	NA	1.298	0.556
SMIM1-/-	S01BQ0	Home visit	Female	NA	NA	NA	72	33.5	3.80952	4.5	5.1	1.1	1.75	54	56	14.7	48	1	83	8.65	625.379	1.36	NA	95	NA	1.474	0.45
SMIM1-/-	S01C27	Home visit	Female	NA	NA	NA	67	36.5	13.058	4.7	6.1	2.2	1.01	48	90.1	6.9	36	1.21	97	26.42	440.145	1.25	NA	81	NA	2.827	0.578
SMIM1-/-	S01C35	Home visit	Male	NA	NA	NA	51	37.3	4.86667	5.1	5.6	2.3	0.88	77	14.6	3	41	1.15	72	1.6	276.351	1.17	NA	60	NA	1.635	0.484
SMIM1-/-	S01D9Q	Recall	Male	NA	NA	NA	25	27.1	0.227273	4.5	3.9	0.6	1.47	45	1	4.4	54	1.05	53	0.19	267.113	1.48	4.9	100	17.1	#N/A	0.366
SMIM1-/-	S01DBM	Recall	Male	NA	NA	NA	52	50.2	7.3	3.5	3.6	2.5	0.95	40	21.9	3	41	0.91	60	3.83	273.691	1.49	5.1	87	13.3	1.429	0.03
SMIM1-/-	S01DDI	Recall	Female	NA	NA	NA	55	20	0.633333	8	5.2	0.8	2.76	42	7.6	12	41	1.14	131	3.44	216.54	1.32	4.1	79	12	1.798	0.328
SMIM1-/-	S01DPV	Home visit	Female	NA	NA	NA	47	20.3	2.48113	3.4	6	0.6	2.3	33	26.3	10.6	51	1.18	121	0.51	147.737	1.23	NA	93	NA	1.076	0.62
SMIM1-/-	S01DQT	Recall	Female	NA	NA	NA	55	23.9	1.43689	5	4.5	1.1	1.68	42	14.8	10.3	44	1.27	19	1.47	312.848	1.63	4.8	95	12.8	2.082	0.344
SMIM1-/-	S01GE4	Recall	Male	NA	NA	NA	57	34.1	3.58537	7	6	2.8	0.98	43	14.7	4.1	48	0.95	62	0.94	184.564	1.13	5.2	85	17.2	1.478	0.444
SMIM1-/-	S01GF2	Recall	Male	NA	NA	NA	38	#N/A	0.742424	5.1	3.4	1.3	1.27	39	4.9	6.6	41	1.23	22	0.6	296.723	1.41	5.8	105	16.5	0.8038	0.166
SMIM1-/-	S01P6L	Recall	Female	NA	NA	NA	48	36.2	10.697	6.8	3.6	1.1	1.01	42	70.6	6.6	37	1.17	12	7.77	460.175	1.07	4	110	17.9	2.043	0.298
SMIM1-/-	S01P7J	Recall	Female	NA	NA	NA	50	35.2	15.3137	2.7	4.9	1.9	1.38	37	78.1	5.1	32	1.25	19	5.75	415.514	1.14	4.8	81	12.6	2.875	0.324
SMIM1-/-	S01P9F	Recall	Female	NA	NA	NA	57	26.7	1.25806	3.3	7.4	1.8	1.72	47	15.6	12.4	61	1.31	42	0.73	699.639	1.26	4.9	80	12.5	3.563	0.776
SMIM1-/-	S01PAD	Home visit	Male	NA	NA	NA	65	30.8	6.16	4.3	4.7	3.7	1.1	40	15.4	2.5	27	1.2	38	2.4	201.739	1.56	NA	86	NA	2.629	-0.02
SMIM1-/-	S01PC9	Recall	Male	NA	NA	NA	37	22.5	0.84	5.2	4.3	1.6	1.34	45	4.2	5	44	1.32	18	1.4	242.709	1.46	4.9	94	13.6	#N/A	0.272
SMIM1-/-	S01PG1	Home visit	Male	NA	NA	NA	44	32.4	0.945946	3.9	4	0.8	1.22	80	3.5	3.7	79	1.2	175	5.17	543.124	1.63	NA	105	NA	1.201	0.396
SMIM1-/-	S01R5F	Recall	Female	NA	NA	NA	38	29	8.83636	4	4.7	1	1.57	25	48.6	5.5	25	1.12	22	0.83	224.211	1.24	4.6	85	14.5	0.8412	0.426
SMIM1-/-	S01S77	Recall	Female	NA	NA	NA	58	20.4	0.694805	4.3	5.7	0.7	2.61	28	10.7	15.4	29	1.11	52	0.82	408.689	1.38	4.6	95	15.7	1.259	0.478
SMIM1-/-	S01S85	Home visit	Male	NA	NA	NA	70	21.9	0.278261	4.3	3.4	0.9	1.2	37	3.2	11.5	34	1.2	19	0.75	219.235	1.31	NA	96	NA	1.303	0.26
SMIM1-/-	S01S93	Home visit	Male	NA	NA	NA	55	21.2	0.164384	3.9	5.3	1.1	1.06	50	1.2	7.3	40	1.2	22	3.1	153.953	1.62	NA	129	NA	1.756	0.628
SMIM1-/-	S01UP0	Home visit	Female	NA	NA	NA	30	#N/A	0.408163	4.3	3.3	0.4	1.48	36	4	9.8	34	1.36	12	0.19	138.535	1.2	NA	82	NA	2.724	0.284

## Sheet: NHSBT free T4 and free T4
ID	Genotype	Gender	Ethnicity	Height	Weight	Age	BMI	Free T3 pmol/l	Free T4 pmol/l
149-01	SMIM1+/+	Female	White	151.8 cm	49.5 kg	33	21.5	6	22.3
149-02	SMIM1+/+	Male	White	181.2 cm	75.2 kg	17	22.9	6	24.1
149-03	SMIM1+/+	Female	White	153.9 cm	74.2 kg	38	31.3	6.5	13.6
149-04	SMIM1+/+	Female	White	166.5 cm	73.4 kg	43	26.5	5.9	14.8
149-05	SMIM1+/+	Male	Black	173.9 cm	55.8 kg	32	18.5	5.4	15.2
149-07	SMIM1+/+	Female	White	168.3 cm	52.9 kg	24	18.7	5.9	14.6
149-08	SMIM1+/+	Female	White	165.3 cm	68.8 kg	26	25.2	5.3	13.6
149-09	SMIM1+/+	Female	White	165.4 cm	67.1 kg	46	24.5	4.8	12
149-10	SMIM1+/+	Male	White	182.7 cm	79.2 kg	34	23.5	6.8	16.6
149-12	SMIM1+/+	Male	White	162.0 cm	67.4 kg	37	25.7	5.8	14.2
149-13	SMIM1+/+	Male	White	177.7 cm	83.6 kg	37	26.5	6.4	16.3
149-14	SMIM1+/+	Female	White	160.2 cm	48.4 kg	29	18.9	4.7	12.6
149-15	SMIM1+/+	Male	White	179.9 cm	85.4 kg	43	26.4	6.3	14.1
149-16	SMIM1+/+	Female	White	166.2 cm	52.3 kg	26	18.9	6.1	10.1
149-17	SMIM1+/+	Female	White	173.6 cm	75.1 kg	29	25.4	5.2	16.9
149-18	SMIM1+/+	Female	White	181.4 cm	68.9 kg	26	20.9	4.3	10.7
149-19	SMIM1+/+	Female	White	173.0 cm	67.8 kg	25	22.7	4.5	11.7
149-20	SMIM1+/+	Male	White	174.5 cm	88.8 kg	32	29.2	6.7	14.6
149-21	SMIM1+/+	Female	White	155.8 cm	64.4 kg	50	26.5	6.2	13.6
149-22	SMIM1+/+	Male	White	179.5 cm	77.9 kg	27	24.2	6.7	17.3
149-23	SMIM1+/+	Male	White	171.6 cm	68.6 kg	53	23.3	8.5	17.3
149-24	SMIM1+/+	Female	White	155.0 cm	52.0 kg	61	21.6	6.3	12.9
149-25	SMIM1+/+	Female	White	166.3 cm	68.2 kg	49	24.7	5.9	12
149-26	SMIM1+/+	Male	White	171.4 cm	74.3 kg	50	25.3	5.8	14
149-28	SMIM1+/+	Female	Asian	155.0 cm	67.8 kg	47	28.2	6.3	13.2
149-29	SMIM1+/+	Male	Asian	163.0 cm	73.2 kg	51	27.6	5.4	11.1
149-27	SMIM1+/+	Female	White	174.4 cm	57.1 kg	24	18.8	4.4	9.7
149-30	SMIM1+/+	Female	White	167.3 cm	61.3 kg	36	21.9	12.1	16.9
149-31	SMIM1+/+	Male	Hispanic	181.4 cm	96.6 kg	46	29.4	6.5	14.3
149-33	SMIM1+/+	Female	White	157.4 cm	49.8 kg	34	20.1	5.1	16.1
149-34	SMIM1+/+	Male	Black	169.9 cm	67.0 kg	28	23.2	4.8	13.6
149-35	SMIM1+/+	Male	White	178.7 cm	63.7 kg	22	19.9	5	12.9
149-36	SMIM1+/+	Female	White	160.5 cm	65.3 kg	54	25.3	5.3	13.4
149-37	SMIM1+/+	Female	White	167.5 cm	50.7 kg	60	18.1	4.9	12.3
149-39	SMIM1+/+	Female	Asian	158.0 cm	45.5 kg	29	18.2	4	11.8
149-40	SMIM1+/+	Female	White	165.2 cm	101.3 kg	38	37.1	4	11
149-42	SMIM1+/+	Female	Asian	154.4 cm	52.1 kg	26	21.9	5.5	16.2
149-50	SMIM1+/+	Female	White	172.2 cm	75.5 kg	22	25.5	5.6	13
149-53	SMIM1+/+	Female	White	159.4 cm	62.3 kg	32	24.5	4.6	12.6
149-54	SMIM1+/+	Female	White	161.0 cm	48.3 kg	22	18.6	4.4	9.3
149-49	SMIM1+/+	Male	Asian	171.1 cm	69.1 kg	29	23.6	5.5	14.9
149-46	SMIM1+/+	Female	White	163.3 cm	90.0 kg	38	33.7	4.6	11.1
149-44	SMIM1+/+	Female	White	157.9 cm	67.9 kg	25	27.2	5.9	12.8
149-43	SMIM1+/+	Female	White	168.9 cm	110.0 kg	33	38.6	6.4	12.2
149-47	SMIM1+/+	Female	White	169.5 cm	50.6 kg	26	17.6	5.8	12.5
149-52	SMIM1+/+	Female	White	168.7 cm	59.6 kg	25	20.9	5.5	16.2
149-66	SMIM1+/+	Male	White	178.4 cm	82.8 kg	38	26	6.1	12.1
149-67	SMIM1+/+	Female	White	162.1 cm	81.8 kg	22	31.1	2.37	11.4
149-68	SMIM1+/+	Male	White	180.0 cm	66.0 kg	24	20.4	6.4	16.7
149-69	SMIM1+/+	Female	White	174.6 cm	63.6 kg	30	20.9	5.6	15.1
149-72	SMIM1+/+	Male	White	186.0 cm	70.4 kg	22	20.3	5.7	13.7
149-75	SMIM1+/+	Male	White	184.0 cm	82.4 kg	23	24.3	5.8	14.1
149-86	SMIM1+/+	Female	White	173.5 cm	61.8 kg	37	20.5	6	11.5
149-82	SMIM1+/+	Female	White	171.6 cm	59.6 kg	34	20.2	5.8	12.9
149-80	SMIM1+/+	Female	White	158.5 cm	65.0 kg	22	25.9	5.5	14.5
149-90	SMIM1+/+	Female	White	172.6 cm	75.8 kg	19	25.4	5.1	11.2
149-78	SMIM1+/+	Male	White	173.8 cm	65.1 kg	37	21.3	4.9	11.4
149-88	SMIM1+/+	Female	White	164.0 cm	65.6 kg	21	24.4	5.4	10.3
149-77	SMIM1+/+	Male	White	185.0 cm	96.8 kg	27	28.3	6.1	12.2
149-93	SMIM1+/+	Female	White	170.7 cm	101.0 kg	34	34.7	5.7	15
149-97	SMIM1+/+	Male	White	188.7 cm	74.0 kg	19	20.8	5.7	13.2
149-98	SMIM1+/+	Female	White	174.4 cm	58.0 kg	30	19.1	5.2	12.6
149-94	SMIM1+/+	Male	White	181.3 cm	94.6 kg	62	28.8	5.3	13.1
149-96	SMIM1+/+	Female	White	165.9 cm	56.4 kg	32	20.5	5	11.5
149-95	SMIM1+/+	Female	White	173.8 cm	79.6 kg	31	26.4	5.3	12.2
149-100	SMIM1+/+	Female	White	167.9 cm	65.0 kg	26	23.1	5.8	15.5
149-101	SMIM1+/+	Male	White	187.7 cm	89.8 kg	26	25.5	5.8	12.8
149-99	SMIM1+/+	Female	White	163.6 cm	58.4 kg	31	21.8	4.7	10.4
149-102	SMIM1+/+	Male	White	189.5 cm	85.4 kg	23	23.8	5.4	14.9
149-112	SMIM1+/+	Male	White	184.8 cm	76.8 kg	23	22.5	5.9	14
149-109	SMIM1+/+	Male	White	180.0 cm	85.0 kg	29	26.2	5.5	15.6
149-106	SMIM1+/+	Female	White	164.1 cm	56.4 kg	23	20.9	7.3	16.2
149-111	SMIM1+/+	Female	White	164.5 cm	70.8 kg	23	26.2	4.9	11.9
149-113	SMIM1+/+	Female	White	156.4 cm	49.4 kg	27	20.2	6.2	16.3
149-114	SMIM1+/+	Female	White	162.4 cm	49.4 kg	22	18.7	4.8	10.4
149-103	SMIM1+/+	Female	White	167.5 cm	67.4 kg	24	24	5.4	13.1
149-118	SMIM1+/+	Male	White	184.0 cm	74.8 kg	35	24.6	5.2	12.9
149-105	SMIM1+/+	Female	White	157.2 cm	50.6 kg	54	20.9	5.2	14.3
149-117	SMIM1+/+	Female	White	161.4 cm	56.4 kg	49	21.7	5	13.5
149-124	SMIM1+/+	Female	White	153.2 cm	54.2 kg	59	23.1	2.27	11.5
149-127	SMIM1+/+	Male	White	177.0 cm	79.0 kg	50	25.2	1.54	13.4
149-125	SMIM1+/+	Male	White	172.9 cm	68.0 kg	19	22.7	0.93	14.6
149-118	SMIM1+/+	Male	White	184.0 cm	74.8 kg	35	22.1	1.12	12.7
149-132	SMIM1+/+	Female	White	164.3 cm	69.6 kg	33	25.8	2.52	11.2
149-130	SMIM1+/+	Male	White	179.0 cm	125.4 kg	22	39.1	1.44	10
149-128	SMIM1+/+	Female	White	165.1 cm	52.6 kg	44	19.3	5.7	12.8
149-156	SMIM1+/+	Female	White	161.0 cm	67.4 kg	36	25.3	4.8	12.2
149-131	SMIM1+/+	Female	White	173.8 cm	89.4 kg	33	29.6	5.1	15.2
149-134	SMIM1+/+	Male	White	184.4 cm	85.5 kg	48	25.1	5.6	13.9
149-152	SMIM1+/+	Female	White	165.0 cm	97.0 kg	49	35.6	5	11.4
149-137	SMIM1+/+	Female	White	158.9 cm	63.2 kg	62	25	4.5	10
149-135	SMIM1+/+	Male	White	180.0 cm	73.6 kg	29	22.7	5.9	16.9
149-161	SMIM1+/+	Male	White	181.8 cm	74.8 kg	17	22.6	6.2	11.8
149-146	SMIM1+/+	Female	White	156.0 cm	62.0 kg	23	25.5	5.3	12.6
149-138	SMIM1+/+	Female	White	163.3 cm	62.8 kg	20	23.5	5.3	12
149-126	SMIM1+/+	Female	White	159.8 cm	64.4 kg	58	25.2	4.6	11.3
149-145	SMIM1+/+	Female	White	176.9 cm	56.0 kg	23	17.9	5.6	15.3
149-164	SMIM1+/+	Female	White	171.3 cm	51.8 kg	25	17.7	4.2	11.9
149-148	SMIM1+/+	Female	White	157.4 cm	64.8 kg	43	26.2	5.4	14.4
149-160	SMIM1+/+	Female	White	167.6 cm	92.4 kg	24	32.9	5.1	12.1
149-154	SMIM1+/+	Female	White	172.3 cm	66.6 kg	52	22.4	5.3	12.7
149-174	SMIM1+/+	Female	White	165.4 cm	76.0 kg	57	27.8	4.4	12.4
149-155	SMIM1+/+	Female	White	172.8 cm	58.2 kg	48	19.5	5.2	12.9
149-181	SMIM1+/+	Female	White	160.9 cm	55.8 kg	20	21.6	4.7	12.4
149-182	SMIM1+/+	Male	White	178.6 cm	70.0 kg	21	21.9	6.9	15.6
149-158	SMIM1+/+	Female	White	188.3 cm	88.2 kg	26	24.9	5.1	13.4
149-184	SMIM1+/+	Female	White	163.5 cm	65.6 kg	51	24.5	5.3	11.8
149-180	SMIM1+/+	Male	White	186.1 cm	100.4 kg	25	29	4.8	10.9
149-169	SMIM1+/+	Male	White	171.7 cm	72.0 kg	55	24.4	5.9	14.4
149-185	SMIM1+/+	Female	White	165.8 cm	62.8 kg	23	22.8	6	13.4
149-168	SMIM1+/+	Male	Asian	173.3 cm	104.2 kg	30	34.7	6	12.7
149-179	SMIM1+/+	Female	White	171.9 cm	74.8 kg	32	25.3	5.1	13
149-187	SMIM1+/+	Female	White	165.1 cm	64.4 kg	30	23.6	5.4	15.6
149-173	SMIM1+/+	Male	White	177.9 cm	91.0 kg	28	28.8	5.2	11.9
149-177	SMIM1+/+	Male	White	177.3 cm	75.4 kg	26	24	6.9	18.3
149-188	SMIM1+/+	Male	White	172.7 cm	75.8 kg	60	24.9	6	13.2
149-186	SMIM1+/+	Female	White	163.1 cm	52.0 kg	26	19.5	5.3	12.3
149-153	SMIM1+/+	Female	Asian	157.8 cm	69.8 kg	35	28	5.5	11.9
149-167	SMIM1+/+	Female	White	166.0 cm	65.4 kg	49	23.7	5.5	12.3
149-136	SMIM1+/+	Male	White	172.0 cm	74.2 kg	27	25.1	5.5	14.4
149-190	SMIM1+/+	Male	White	180.8 cm	70.4 kg	24	21.5	5.9	13.9
149-133	SMIM1+/+	Female	White	160.3 cm	75.6 kg	53	29.4	5.6	13.6
149-191	SMIM1+/+	Male	White	189.1 cm	93.2 kg	46	26.1	6	14.2
149-196	SMIM1+/+	Male	White	178.5 cm	75.7 kg	22	23.8	5.6	15.2
149-193	SMIM1+/+	Female	White	161.7 cm	77.4 kg	25	26.8	6.3	16.4
149-194	SMIM1+/+	Female	White	155.0 cm	63.8 kg	53	26.6	5.7	14.2
149-195	SMIM1+/+	Male	White	186.0 cm	80.2 kg	50	23.2	5.1	11.9
149-197	SMIM1+/+	Female	White	167.1 cm	86.4 kg	26	30.9	5.6	14.5
149-192	SMIM1+/+	Female	White	183.7 cm	86.0 kg	31	25.5	4.1	10.9
149-139	SMIM1+/+	Female	White	183.9 cm	119.6 kg	42	35.4	5.2	14.3
149-199	SMIM1+/+	Female	White	159.3 cm	76.5 kg	63	30.1	5.1	9.3
149-159	SMIM1+/+	Male	White	175.3 cm	64.6 kg	53	20.5	5.5	15.1
149-157	SMIM1+/+	Female	White	158.5 cm	49.3 kg	26	19.6	4.9	13
149-149	SMIM1+/+	Female	White	165.7 cm	63.9 kg	35	23.3	5.7	14.8
149-198	SMIM1+/+	Female	White	159.8 cm	51.0 kg	57	20	5.3	10.9
149-213	SMIM1+/+	Male	White	168.3 cm	62.8 kg	23	22.2	5.2	15.4
149-212	SMIM1+/+	Male	White	180.0 cm	79.9 kg	45	24.7	5.4	15.5
149-210	SMIM1+/+	Male	White	170.1 cm	60.5 kg	26	20.9	5.7	13.6
149-201	SMIM1+/+	Male	White	188.4 cm	79.6 kg	32	22.4	6.5	12.9
149-218	SMIM1+/+	Male	White	167.2 cm	70.9 kg	54	25.4	4.9	12.7
149-217	SMIM1+/+	Male	White	160.9 cm	72.3 kg	53	27.9	5.4	13.3
149-215	SMIM1+/+	Female	White	161.8 cm	62.5 kg	26	23.9	6.5	14.5
149-225	SMIM1+/+	Male	White	178.3 cm	84.6 kg	56	26.6	6.4	10.3
149-223	SMIM1+/+	Female	White	161.7 cm	60.3 kg	30	23.1	5.7	12.4
149-226	SMIM1+/+	Female	Asian	157.6 cm	52.8 kg	22	21.3	5.2	13.8
149-219	SMIM1+/+	Male	White	190.0 cm	95.8 kg	32	26.5	6	13.1
149-227	SMIM1+/+	Female	White	168.4 cm	61.8 kg	25	21.8	4.2	11.7
149-235	SMIM1+/+	Female	White	164.1 cm	50.8 kg	30	18.9	5.4	11.2
149-214	SMIM1+/+	Female	White	155.6 cm	86.0 kg	54	35.5	4.4	10.4
149-237	SMIM1+/+	Female	White	160.4 cm	51.3 kg	27	19.9	4.2	11.8
149-230	SMIM1+/+	Female	Asian	160.3 cm	49.0 kg	35	19.1	5.3	14.3
149-231	SMIM1+/+	Male	White	181.1 cm	69.4 kg	32	21.2	5.3	13.5
149-234	SMIM1+/+	Male	White	170.3 cm	80.3 kg	39	27.7	7.9	20.7
149-232	SMIM1+/+	Male	White	180.0 cm	73.4 kg	31	22.7	4.9	13.7
149-239	SMIM1+/+	Female	White	157.3 cm	61.5 kg	44	24.9	4.3	12.3
149-238	SMIM1+/+	Male	White	174.0 cm	73.6 kg	22	24.3	2.7	9.3
149-193	SMIM1+/+	Female	White	161.7 cm	77.4 kg	27	29.6	6.3	16.4
149-341	SMIM1+/+	Female	White	165.4 cm	54.2 kg	21	19.8	5.4	14.8
149-345	SMIM1+/+	Male	White	180.6 cm	106.2 kg	44	32.6	5.3	14.8
149-344	SMIM1+/+	Female	White	162.6 cm	73.8 kg	46	27.9	4.9	15.8
149-347	SMIM1+/+	Male	White	176.9 cm	70.6 kg	23	22.6	6.5	16.2
149-348	SMIM1+/+	Male	White	175.0 cm	78.1 kg	52	25.5	5.1	14.6
149-350	SMIM1+/+	Female	Asian	154.0 cm	49.3 kg	23	20.8	4.4	12.5
149-351	SMIM1+/+	Female	Asian	151.9 cm	54.2 kg	29	23.5	4.6	13.7
149-352	SMIM1+/+	Female	Asian	149.5 cm	46.3 kg	28	20.7	4.5	13.3
149-353	SMIM1+/+	Male	White	179.3 cm	79.4 kg	30	24.7	6.8	14.3
149-354	SMIM1+/+	Female	White	162.9 cm	62.7 kg	26	23.6	5.5	15.2
149-355	SMIM1+/+	Female	White	163.0 cm	74.3 kg	33	28	5	14
149-356	SMIM1+/+	Female	Asian	160.6 cm	58.7 kg	31	22.8	3.5	10.7
149-357	SMIM1+/+	Female	White	165.0 cm	62.2 kg	19	22.8	5.7	15.2
149-358	SMIM1+/+	Male	White	182.9 cm	124.6 kg	33	37.2	5.5	14
149-359	SMIM1+/+	Male	White	172.0 cm	65.0 kg	17	22	7	16.7
149-360	SMIM1+/+	Female	White	179.4 cm	71.0 kg	29	22.1	4.4	15.4
149-361	SMIM1+/+	Female	White	160.7 cm	68.6 kg	62	26.6	5.4	13.2
149-364	SMIM1+/+	Female	White	163.9 cm	62.4 kg	22	23.2	5.4	14.8
149-365	SMIM1+/+	Male	White	181.6 cm	62.6 kg	24	19	3.6	11.2
149-367	SMIM1+/+	Male	White	170.0 cm	64.2 kg	49	22.2	5	15.2
149-366	SMIM1+/+	Female	White	158.8 cm	56.8 kg	44	22.5	4.9	13.2
149-368	SMIM1+/+	Female	White	164.3 cm	65.9 kg	28	24.4	4.6	13.5
149-369	SMIM1+/+	Male	White	182.1 cm	83.2 kg	40	25.1	5.5	12.5
149-370	SMIM1+/+	Female	Other	151.0 cm	65.0 kg	57	28.5	4.5	16
149-372	SMIM1+/+	Female	White	160.9 cm	62.2 kg	41	24	5.4	12.7
149-371	SMIM1+/+	Male	Black	171.3 cm	74.6 kg	53	25.4	4.4	15.5
149-373	SMIM1+/+	Female	White	163.1 cm	62.3 kg	45	23.4	5.8	15.1
149-374	SMIM1+/+	Female	White	170.3 cm	105.4 kg	33	36.3	5.2	9.8
149-376	SMIM1+/+	Female	White	173.0 cm	70.6 kg	47	23.6	4.9	13.1
149-377	SMIM1+/+	Male	White	187.2 cm	77.4 kg	17	22.1	6	15.4
149-378	SMIM1+/+	Female	White	155.4 cm	69.8 kg	43	28.9	4.7	15.8
149-379	SMIM1+/+	Male	White	174.8 cm	54.0 kg	18	17.7	6.2	16.4
149-380	SMIM1+/+	Male	White	169.9 cm	61.4 kg	18	21.3	5.1	15.1
149-381	SMIM1+/+	Female	White	176.4 cm	65.8 kg	17	21.1	5.6	13.6
149-383	SMIM1+/+	Male	White	162.1 cm	53.8 kg	18	20.5	6.1	15
149-385	SMIM1+/+	Female	Black	166.1 cm	92.2 kg	38	33.4	4.9	13.7
149-387	SMIM1+/+	Male	White	167.3 cm	46.8 kg	17	16.7	6.2	17.3
149-388	SMIM1+/+	Male	White	171.1 cm	60.3 kg	18	20.6	5.7	14.9
149-389	SMIM1+/+	Male	White	179.3 cm	64.8 kg	17	20.2	6.7	14.3
149-390	SMIM1+/+	Male	White	178.5 cm	63.4 kg	17	19.9	6.8	16.4
149-391	SMIM1+/+	Female	White	167.9 cm	59.6 kg	17	21.1	5.2	13
149-392	SMIM1+/+	Male	White	180.4 cm	84.2 kg	31	26.5	5.8	13.6
149-395	SMIM1+/+	Female	White	165.8 cm	53.6 kg	17	19.5	5.9	17.2
149-396	SMIM1+/+	Male	White	176.1 cm	70.2 kg	17	22.6	5.2	14.3
149-399	SMIM1+/+	Male	Asian	161.8 cm	46.6 kg	17	17.8	5.8	13.6
149-402	SMIM1+/+	Male	White	178.4 cm	71.2 kg	17	22.4	5.8	13.8
149-403	SMIM1+/+	Male	White	183.8 cm	79.4 kg	17	23.5	6.2	13.2
149-406	SMIM1+/+	Male	White	169.9 cm	82.2 kg	17	28.5	6.5	14
149-407	SMIM1+/+	Male	White	166.8 cm	60.9 kg	17	21.9	6.4	14.4
149-404	SMIM1+/+	Female	Asian	148.7 cm	43.0 kg	46	19.4	13	29.5
149-405	SMIM1+/+	Male	White	167.3 cm	72.2 kg	36	25.8	5.3	13.6
149-411	SMIM1+/+	Male	White	171.3 cm	87.6 kg	43	29.9	5.4	12.1
149-413	SMIM1+/+	Female	White	169.3 cm	74.8 kg	26	26.1	5.6	13.6
149-414	SMIM1+/+	Female	White	170.2 cm	54.2 kg	29	19.2	4.5	12.6
149-415	SMIM1+/+	Female	White	165.8 cm	66.7 kg	25	24.3	4.7	12.7
149-416	SMIM1+/+	Female	White	169.2 cm	71.8 kg	41	25.1	5.3	12.8
149-417	SMIM1+/+	Female	White	170.2 cm	57.5 kg	29	19.8	4.6	13.4
149-419	SMIM1+/+	Male	White	174.4 cm	77.4 kg	39	25.4	4.6	13
149-421	SMIM1+/+	Male	White	178.0 cm	83.0 kg	52	26.2	5.9	17
149-425	SMIM1+/+	Male	White	188.9 cm	73.2 kg	17	20.5	6.2	12.5
149-426	SMIM1+/+	Male	White	180.0 cm	61.2 kg	17	18.9	6.2	13.3
149-427	SMIM1+/+	Male	White	185.8 cm	75.0 kg	17	21.7	5.6	14.7
149-428	SMIM1+/+	Female	White	165.5 cm	65.0 kg	39	23.7	5.4	13.8
149-432	SMIM1+/+	Male	White	183.9 cm	65.0 kg	64	19.2	4.1	14.8
149-435	SMIM1+/+	Male	White	172.9 cm	60.2 kg	21	20.1	5.7	18.6
149-440	SMIM1+/+	Female	Asian	157.1 cm	66.7 kg	30	27	4.8	16.1
149-448	SMIM1+/+	Female	White	172.8 cm	74.8 kg	28	25.1	4.6	14.5
149-449	SMIM1+/+	Female	White	164.4 cm	56.4 kg	35	20.9	4.4	13.8
149-451	SMIM1+/+	Male	White	180.0 cm	109.7 kg	56	33.9	4.8	15.1
149-452	SMIM1+/+	Female	White	151.3 cm	55.9 kg	43	24.4	4.8	16.6
149-450	SMIM1+/+	Female	White	160.0 cm	60.3 kg	51	23.6	4.6	16.7
149-453	SMIM1+/+	Female	White	182.9 cm	115.8 kg	48	34.6	4.5	11.6
149-454	SMIM1+/+	Male	White	188.4 cm	75.4 kg	52	21.2	4.8	15.7
149-455	SMIM1+/+	Female	Asian	161.8 cm	63.4 kg	47	24.2	4.5	13
149-457	SMIM1+/+	Female	White	165.1 cm	67.1 kg	42	24.6	4.7	11.9
149-458	SMIM1+/+	Female	Asian	154.1 cm	46.7 kg	48	19.7	4.4	17.2
149-459	SMIM1+/+	Female	White	158.2 cm	49.5 kg	26	19.8	5.6	16.7
149-460	SMIM1+/+	Female	White	162.1 cm	62.6 kg	48	23.8	4.6	13.8
149-461	SMIM1+/+	Female	White	174.6 cm	70.5 kg	59	23.1	4.5	12.9
149-463	SMIM1+/+	Female	White	164.7 cm	49.1 kg	38	18.1	4.9	14.4
149-464	SMIM1+/+	Female	White	163.9 cm	70.2 kg	30	26.1	5.2	13.2
149-465	SMIM1+/+	Female	White	172.0 cm	89.2 kg	38	30.2	4.8	13.3
149-466	SMIM1+/+	Male	Asian	177.0 cm	70.0 kg	38	22.3	5.1	15.3
149-467	SMIM1+/+	Female	Hispanic	162.5 cm	71.3 kg	36	27	5.1	14
149-471	SMIM1+/+	Female	White	177.2 cm	74.4 kg	27	23.7	4.8	16.8
149-472	SMIM1+/+	Female	White	167.4 cm	59.2 kg	27	21.1	4.7	16.7
149-473	SMIM1+/+	Male	Asian	167.8 cm	66.5 kg	25	23.6	5.5	15.6
149-474	SMIM1+/+	Female	White	168.5 cm	65.0 kg	23	22.9	4.7	12.6
149-475	SMIM1+/+	Female	White	165.8 cm	62.3 kg	25	22.7	4.8	15
149-476	SMIM1+/+	Female	White	160.7 cm	71.5 kg	56	27.7	4.8	14.6
149-477	SMIM1+/+	Male	White	165.8 cm	83.2 kg	55	30.3	4.7	14.3
149-478	SMIM1+/+	Male	White	191.1 cm	91.2 kg	27	25	4.6	17.1
149-479	SMIM1+/+	Female	White	172.0 cm	74.0 kg	53	25	4.7	14.1
149-480	SMIM1+/+	Male	White	188.4 cm	86.4 kg	53	24.3	4.5	11.6
149-481	SMIM1+/+	Female	White	155.8 cm	65.3 kg	51	26.9	3.8	13.5
149-482	SMIM1+/+	Male	Asian	174.5 cm	72.5 kg	34	23.8	5	12.4
149-483	SMIM1+/+	Female	White	172.3 cm	73.9 kg	40	24.9	4.5	13.2
149-484	SMIM1+/+	Male	Asian	184.2 cm	112.2 kg	20	33.1	5.7	19
149-485	SMIM1+/+	Female	White	166.0 cm	70.1 kg	23	25.4	5.5	13
149-486	SMIM1+/+	Female	Asian	149.0 cm	46.7 kg	27	21	4.9	14.9
149-487	SMIM1+/+	Female	Asian	156.2 cm	58.7 kg	32	24.1	5	17.4
149-488	SMIM1+/+	Female	White	156.1 cm	46.8 kg	42	19.2	4.7	11.7
149-490	SMIM1+/+	Male	White	179.3 cm	96.6 kg	42	30	5.1	13
149-491	SMIM1+/+	Male	White	183.3 cm	80.8 kg	20	24	5.9	14.6
149-495	SMIM1+/+	Male	White	175.5 cm	63.7 kg	38	20.7	5.2	16.6
149-508	SMIM1+/+	Female	White	171.8 cm	64.8 kg	62	22	3.6	10.7
149-510	SMIM1+/+	Male	White	178.7 cm	75.1 kg	34	23.5	5.3	15.9
149-511	SMIM1+/+	Female	White	164.8 cm	60.2 kg	48	22.2	5.3	15.6
149-512	SMIM1+/+	Male	White	177.7 cm	91.5 kg	62	29	5.1	13
149-493	SMIM1-/-	Female	White	NA	NA	55	35.2	4.8	12.6
149-494	SMIM1-/-	Male	White	NA	NA	63	34.1	5.2	17.2
149-496	SMIM1-/-	Female	White	NA	NA	60	20	4.1	12
149-497	SMIM1-/-	Male	White	NA	NA	57	50.2	5.1	13.3
149-499	SMIM1-/-	Female	White	NA	NA	52	36.2	4	17.9
149-500	SMIM1-/-	Male	White	NA	NA	30	27.1	4.9	17.1
149-501	SMIM1-/-	Female	White	NA	NA	42	29	4.6	14.5
149-502	SMIM1-/-	Female	White	NA	NA	62	20.4	4.6	15.7
149-503	SMIM1-/-	Female	White	NA	NA	62	26.7	4.9	12.5
149-505	SMIM1-/-	Female	White	NA	NA	59	23.9	4.8	12.8
149-506	SMIM1-/-	Male	White	NA	NA	43	#N/A	5.8	16.5
149-509	SMIM1-/-	Male	White	NA	NA	41	22.5	4.9	13.6
