# Supplementary material for: Loss of function variant in SMIM1 is associated with reduced energy expenditure and weight gain
Source: Research Square preprint supplement (doi:10.21203/rs.3.rs-1239303/v1), 2022-01-24
Supplement: Supplementary file 11 [file fe45c2cdc84a4e41d384cbf4.xlsx]

## Sheet: Body weight
ID	Gender	Genotype	Age (weeks)	Age (Months)	Body (g)
239	M	Homo	9	2	22.6
342	M	Homo	9	2	23.4
343	M	Homo	9	2	27
299	M	Homo	9	2	17.6
294	M	Homo	9.5	2	25.7
295	M	Homo	9.5	2	23.5
187	M	Homo	15	3.5	27.8
185	M	Homo	15	3.5	28.2
188	M	Homo	15	3.5	28.6
213	M	Homo	16	4	26.8
215	M	Homo	16	4	29.1
149	M	Homo	16	4	29.8
147	M	Homo	16	4	30
198	M	Homo	16	4	30.3
197	M	Homo	16	4	31.3
148	M	Homo	16	4	31.8
186	M	Homo	16	4	31.9
410	M	Homo	17	4	27
150	M	Homo	17	4	33
169	M	Homo	17	4	36.8
129	M	Homo	18	4	30.4
131	M	Homo	18	4	30.8
270	M	Homo	20	5	34.3
269	M	Homo	20	5	36.8
268	M	Homo	20	5	39
400	M	Homo	24	6	39
394	M	Homo	26	6	40
181	M	Homo	26	6	42.9
393	M	Homo	26	6	46
388	M	Homo	27	6	26
307	M	Homo	27	6	31
302	M	Homo	27	6	32
303	M	Homo	27	6	36
347	M	Homo	27	6	36
304	M	Homo	27	6	39
183	M	Homo	27	6	39
184	M	Homo	27	6	40.5
350	M	Homo	27	6	47
352	M	Homo	27	6	48
351	M	Homo	27	6	49
182	M	Homo	28	6	39.1
266	M	Homo	28	6	40
265	M	Homo	28	6	43.8
267	M	Homo	28	6	45.4
313	M	Homo	29	7	42
306	M	Homo	30	7	34
249	M	Homo	31	7	29
128	M	Homo	31	7	34
305	M	Homo	31	7	35
225	M	Homo	34	8	34
226	M	Homo	34	8	41.3
102	M	Homo	35	8	40.4
326	M	WT	9	2	20.4
233	M	WT	9	2	23.2
327	M	WT	9	2	21.7
285	M	WT	10	2	23.9
206	M	WT	16	4	31.5
207	M	WT	16	4	33.7
J13 19406	M	WT	16	4	34.3
J14 19408	M	WT	16	4	35.6
J15 19405	M	WT	16	4	32.7
408	M	WT	17	4	30
165	M	WT	17	4	30.6
142	M	WT	17	4	30.7
144	M	WT	17	4	41.1
J8 18 945	M	WT	18	4	30.6
J9 18946	M	WT	18	4	31.1
166	M	WT	18	4	31.5
143	M	WT	18	4	39.8
378	M	WT	25	6	32
377	M	WT	26	6	37
175	M	WT	27	6	29.8
389	M	WT	27	6	31
BN184	M	WT	27	6	32
385	M	WT	27	6	32
369	M	WT	27	6	33
366	M	WT	27	6	35
383	M	WT	27	6	37
310	M	WT	27	6	43
BN185	M	WT	27	6	43
BN183	M	WT	27	6	43
316	M	WT	28	6	34
336	M	WT	28	6	35
160	M	WT	28	6	41.7
164	M	WT	28	6	42
320	M	WT	29	7	35
321	M	WT	29	7	35
338	M	WT	29	7	35
317	M	WT	29	7	40
337	M	WT	30	7	32
250	M	WT	30	7	38.8
156	M	WT	30	7	45.3
247	M	WT	31	7	31
245	M	WT	31	7	32.1
244	M	WT	31	7	34
300-BL	F	Homo	9	2	20
301-BR	F	Homo	10	2	19.4
229	F	Homo	10	2	19.6
275	F	Homo	9	2	21.7
273	F	Homo	9	2	20
345	F	Homo	9	2	20.1
315	F	Homo	10	2	21.1
154	F	Homo	16	4	22.8
199	F	Homo	16	4	23
153	F	Homo	16	4	23.2
414	F	Homo	17	4	24
171	F	Homo	17	4	25
172	F	Homo	17	4	26.9
170	F	Homo	17	4	27.5
173	F	Homo	17	4	28.2
402	F	Homo	18	4	29
404	F	Homo	18	4	30
395	F	Homo	25	6	32
398	F	Homo	25	6	33
397	F	Homo	26	6	35
396	F	Homo	26	6	40
362	F	Homo	27	6	25
200	F	Homo	27	6	34.2
201	F	Homo	27	6	37.9
314	F	Homo	28	6	30
189	F	Homo	28	6	32.5
190	F	Homo	28	6	33
355	F	Homo	28	6	40
356	F	Homo	28	6	46
354	F	Homo	29	7	33
309	F	Homo	29	7	37
353	F	Homo	29	7	49
291-TR	F	WT	10	2	19.5
235	F	WT	9	2	18
280	F	WT	9	2	18.8
331	F	WT	9	2	17.6
332	F	WT	9	2	18.5
J12 19414	F	WT	16	4	19.85
J11 19413	F	WT	16	4	20.8
209	F	WT	16	4	22.2
J10 19412	F	WT	16	4	23.16
145	F	WT	16	4	26.2
146	F	WT	16	4	27.7
167	F	WT	17	4	24
420	F	WT	17	4	26
406	F	WT	18	4	26
405	F	WT	18	4	27
370	F	WT	25	6	27
373	F	WT	25	6	29
380	F	WT	25	6	30
381	F	WT	25	6	33
361	F	WT	27	6	24
339	F	WT	27	6	25
375	F	WT	27	6	27
335	F	WT	27	6	29
374	F	WT	28	6	24
365	F	WT	28	6	24
178	F	WT	28	6	25.3
179	F	WT	28	6	29.7
194	F	WT	28	6	37.5
195	F	WT	28	6	38.5
387	F	WT	29	7	25
